# Supplementary material for: A biologically relevant ceramide fluorescent probe to assess the binding of potential ligands to the CERT transfer protein
Source: Royal Society of Chemistry journal article supplement (doi:10.1039/c3ra42395f), 2013-01-01
Supplement: c3ra42395f.pdf [file c3ra42395f.pdf]

## Electronic Supplementary Information

### A biologically relevant fluorescent probe to assess the binding of ceramide to the CERT transfer protein

Stéphanie Combemale, Cécile Santos, Frédéric Rodriguez, Virginie Garcia, Chantal Galaup, Céline Frongia, Valérie Lobjois, Thierry Levade, Cécile Baudoin-Dehoux, Stéphanie Ballereau and Yves Génisson

#### Table of contents

|                                                    |             |                                                    |             |
|----------------------------------------------------|-------------|----------------------------------------------------|-------------|
| <sup>13</sup> C NMR spectrum of compound <b>8</b>  | <b>S-2</b>  | <sup>13</sup> C NMR spectrum of compound <b>15</b> | <b>S-15</b> |
| <sup>13</sup> C NMR spectrum of compound <b>9</b>  | <b>S-3</b>  | <sup>13</sup> C NMR spectrum of compound <b>18</b> | <b>S-16</b> |
| <sup>13</sup> C NMR spectrum of compound <b>3</b>  | <b>S-4</b>  | Superposition of cristallographic pose             |             |
| <sup>13</sup> C NMR spectrum of compound <b>10</b> | <b>S-5</b>  | (2E3O) with docked poses of C16-Cer                | <b>S-17</b> |
| <sup>13</sup> C NMR spectrum of compound <b>13</b> | <b>S-6</b>  | Superposition of eleven docked poses of            |             |
| <sup>13</sup> C NMR spectrum of compound <b>16</b> | <b>S-7</b>  | probe <b>16</b>                                    | <b>S-18</b> |
| <sup>13</sup> C NMR spectrum of compound <b>19</b> | <b>S-8</b>  | Details of H-bonding calculated using              |             |
| <sup>13</sup> C NMR spectrum of compound <b>4</b>  | <b>S-9</b>  | Molegro Virtual Docker                             | <b>S-19</b> |
| <sup>13</sup> C NMR spectrum of compound <b>11</b> | <b>S-10</b> | Binding assay of <b>16</b> , C6-NBD-Cer and C5-    |             |
| <sup>13</sup> C NMR spectrum of compound <b>14</b> | <b>S-11</b> | DMB-Cer to START domain                            | <b>S-20</b> |
| <sup>13</sup> C NMR spectrum of compound <b>17</b> | <b>S-12</b> | Intracellular distribution of the C5-DMB-Cer       | <b>S-21</b> |
| <sup>13</sup> C NMR spectrum of compound <b>5</b>  | <b>S-13</b> | Intracellular distribution of compound 16          | <b>S-22</b> |
| <sup>13</sup> C NMR spectrum of compound <b>12</b> | <b>S-14</b> | Intracellular distribution of the C5-NBD-Cer       | <b>S-23</b> |

# $^{13}\text{C}$ NMR spectrum ( $\text{CDCl}_3$ , 75 MHz) of compound **8**

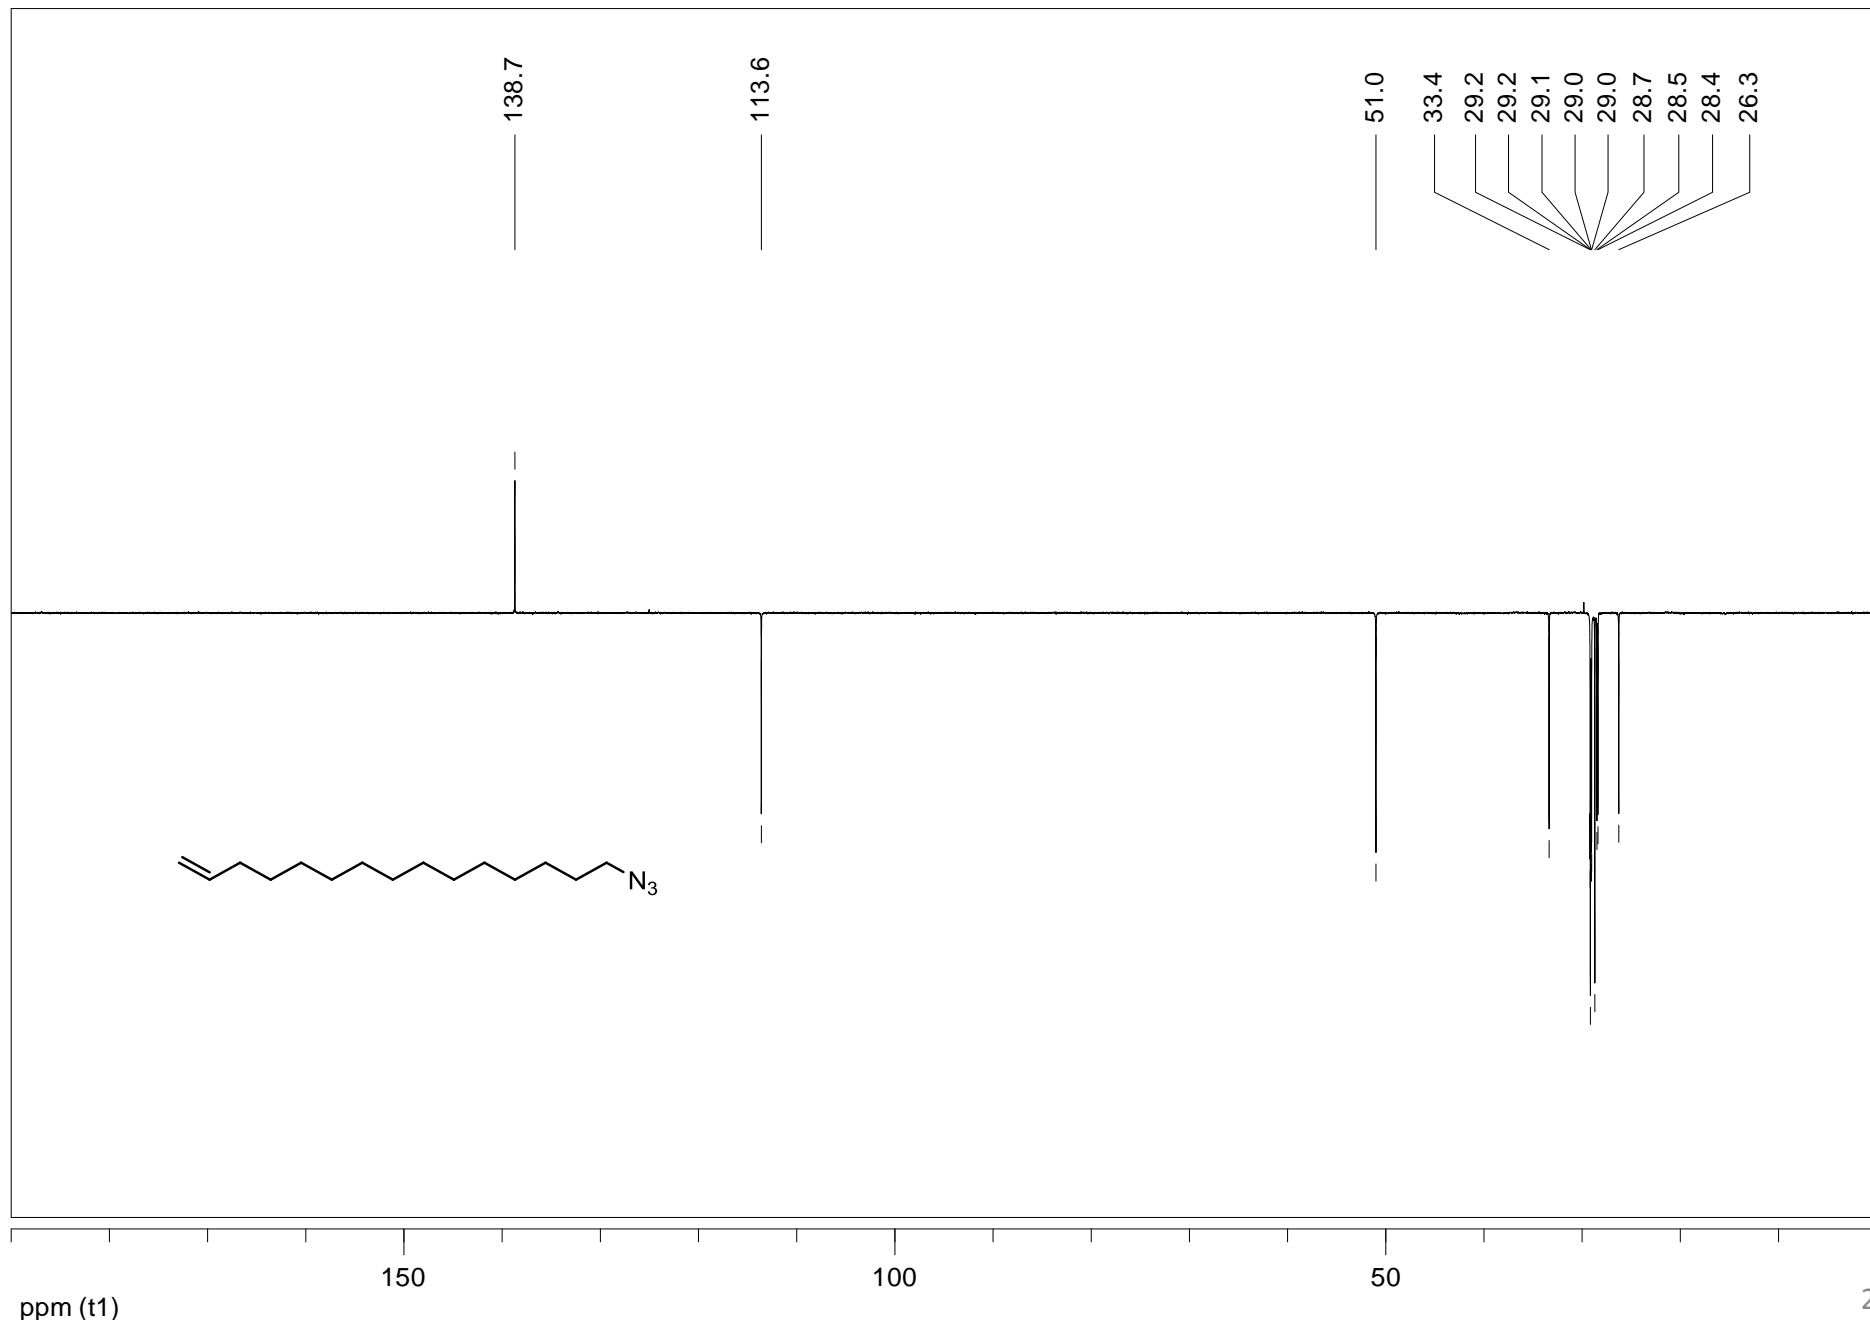

# $^{13}\text{C}$ NMR spectrum ( $\text{CDCl}_3$ , 75 MHz) of compound **9**

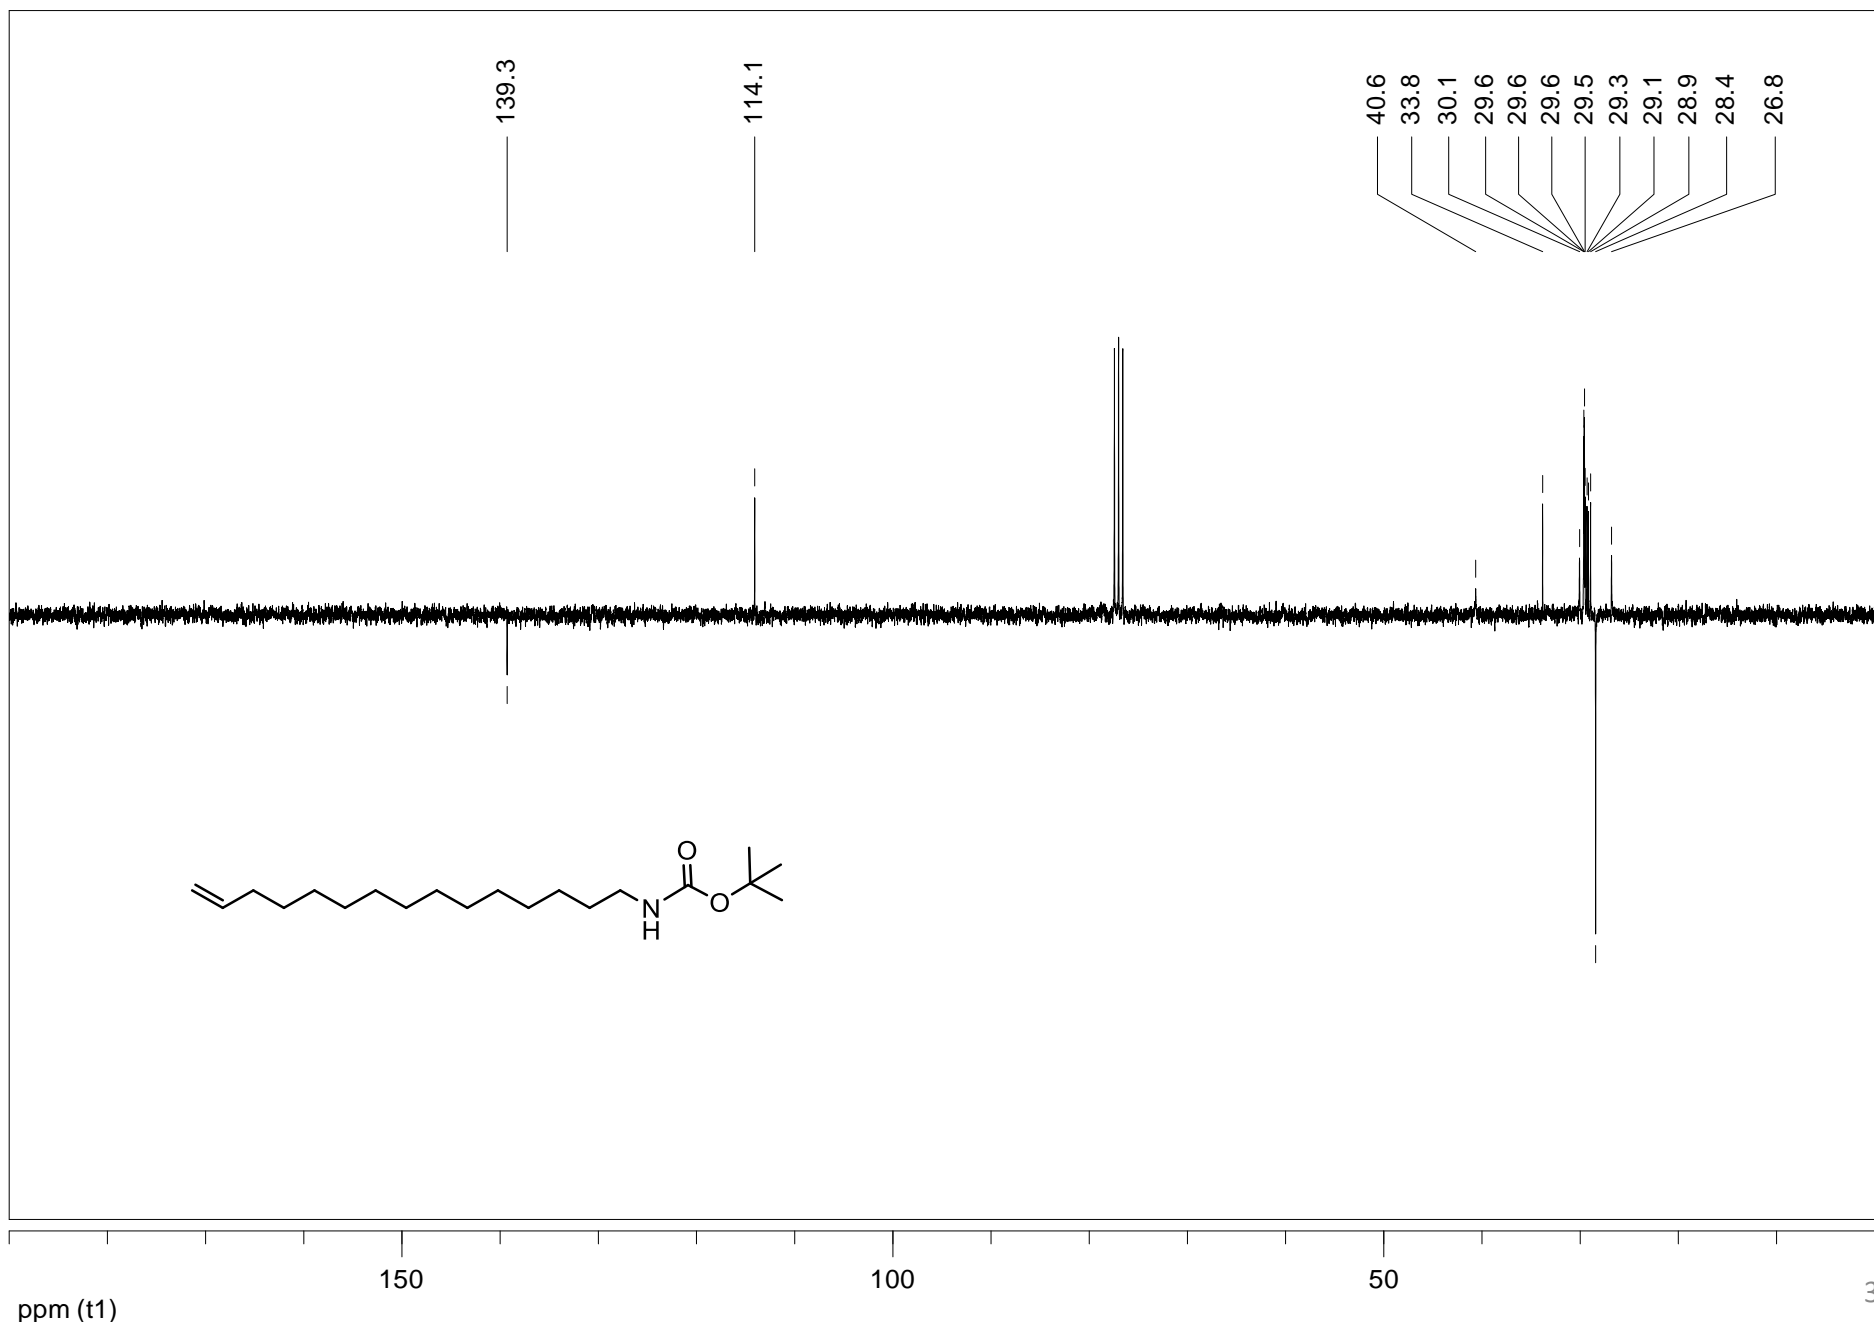

# $^{13}\text{C}$ NMR spectrum ( $\text{CD}_3\text{OD}$ , 75 MHz) of compound **3**

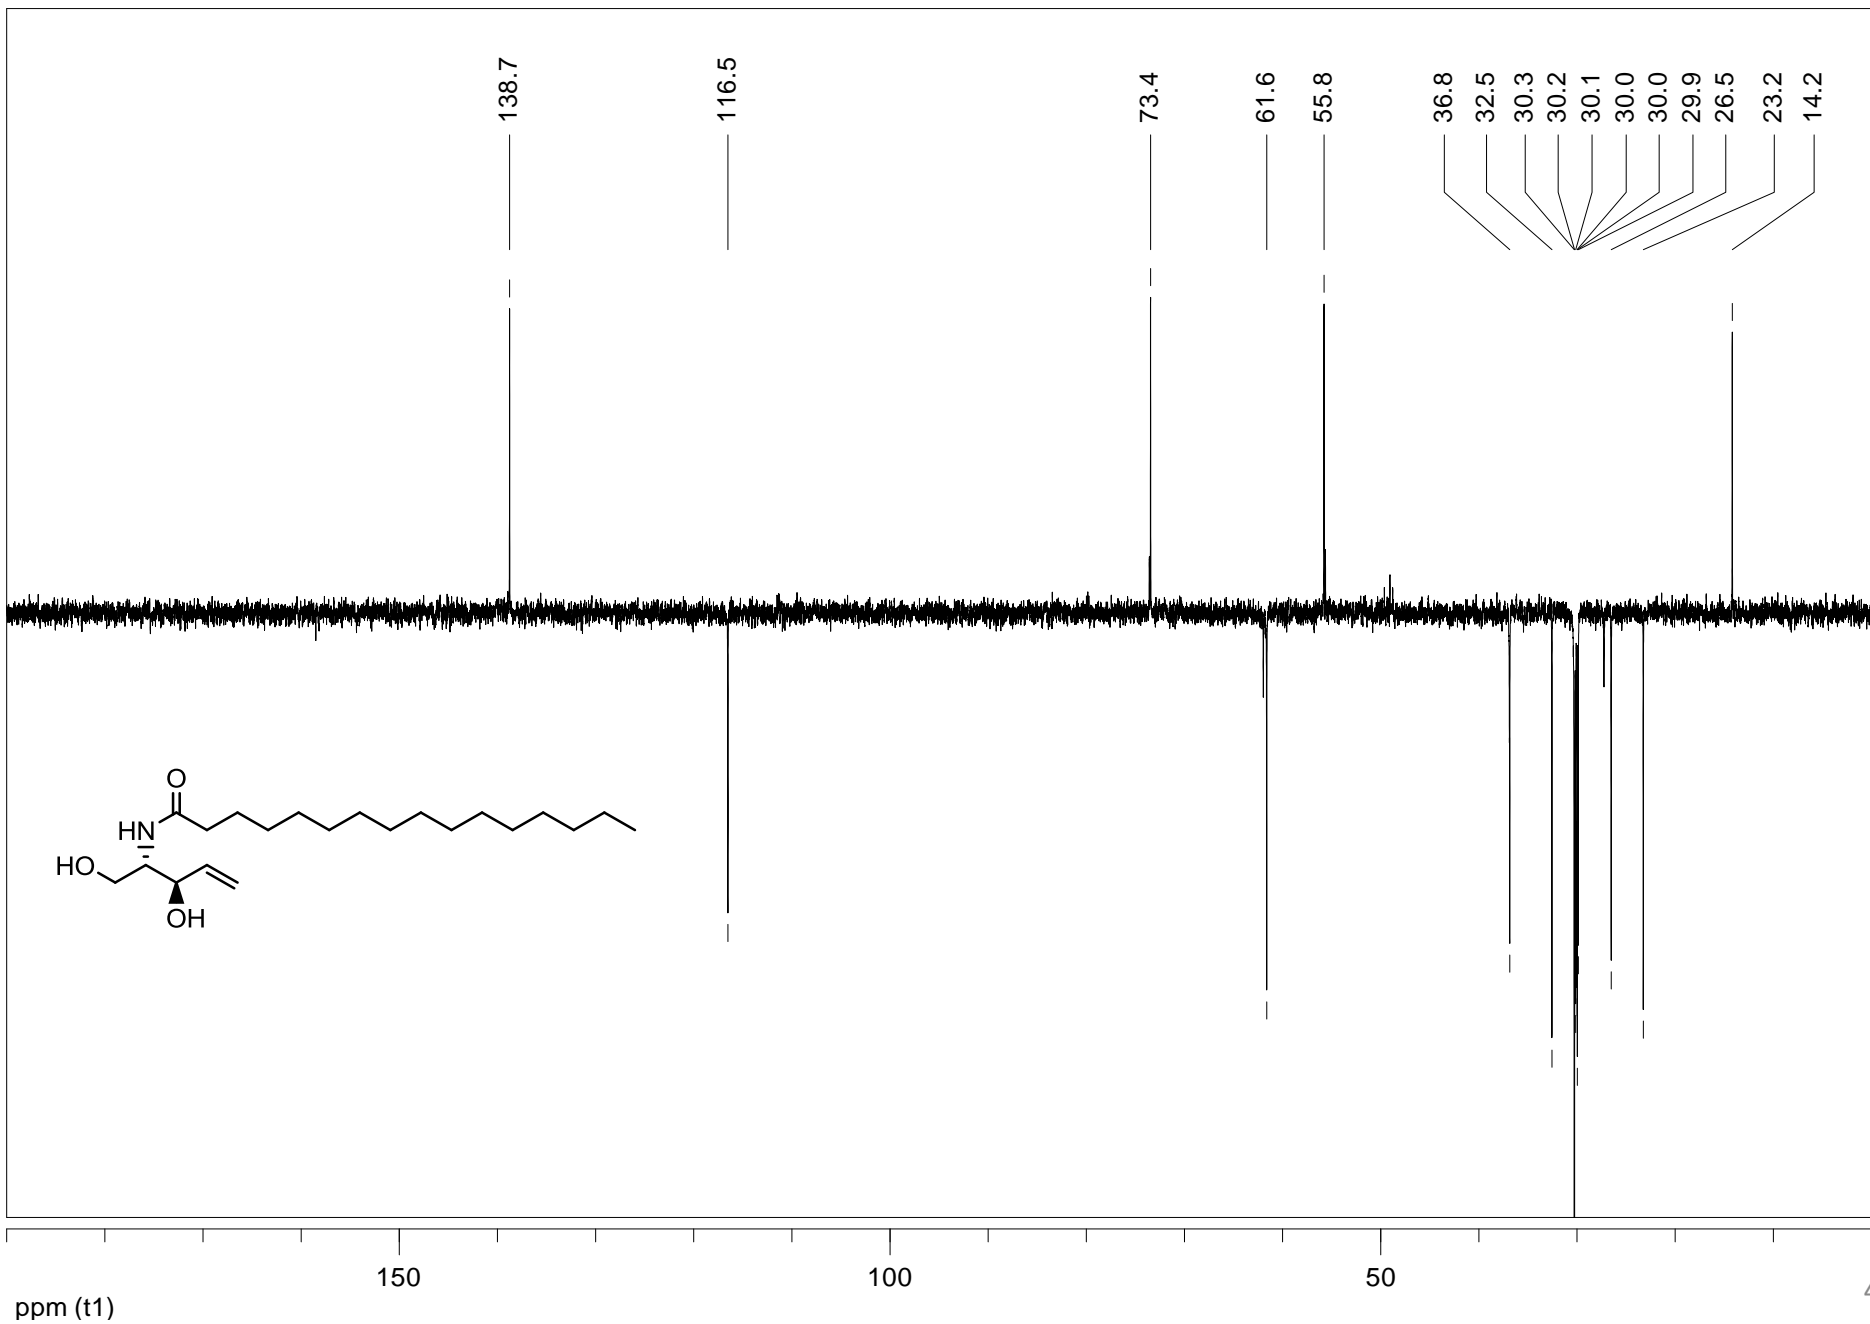



# $^{13}\text{C}$ NMR spectrum ( $\text{CD}_3\text{OD}$ , 75 MHz) of compound **13**

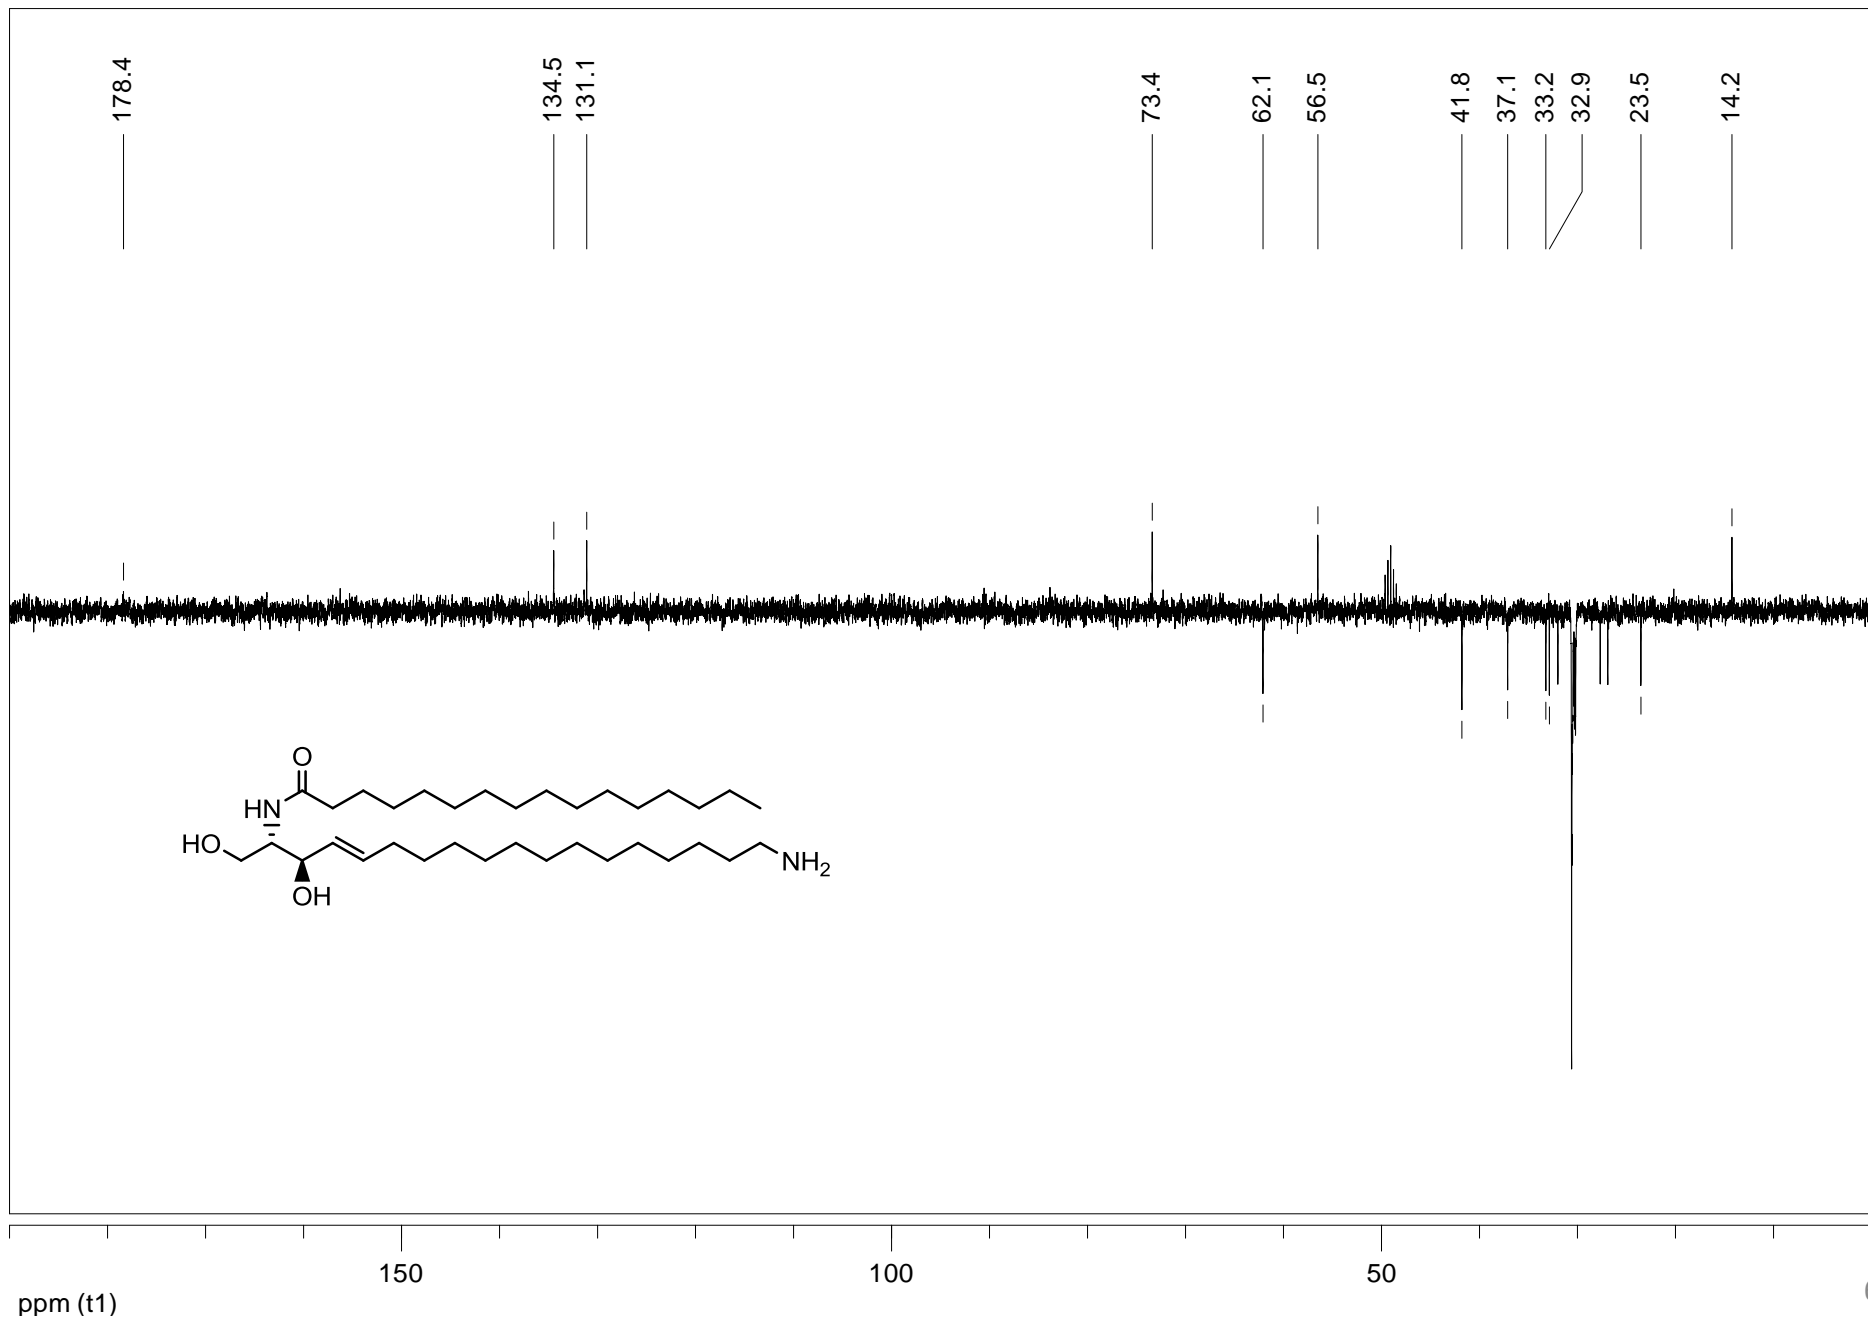

# $^{13}\text{C}$ NMR spectrum ( $\text{CDCl}_3$ , 75 MHz) of compound **16**

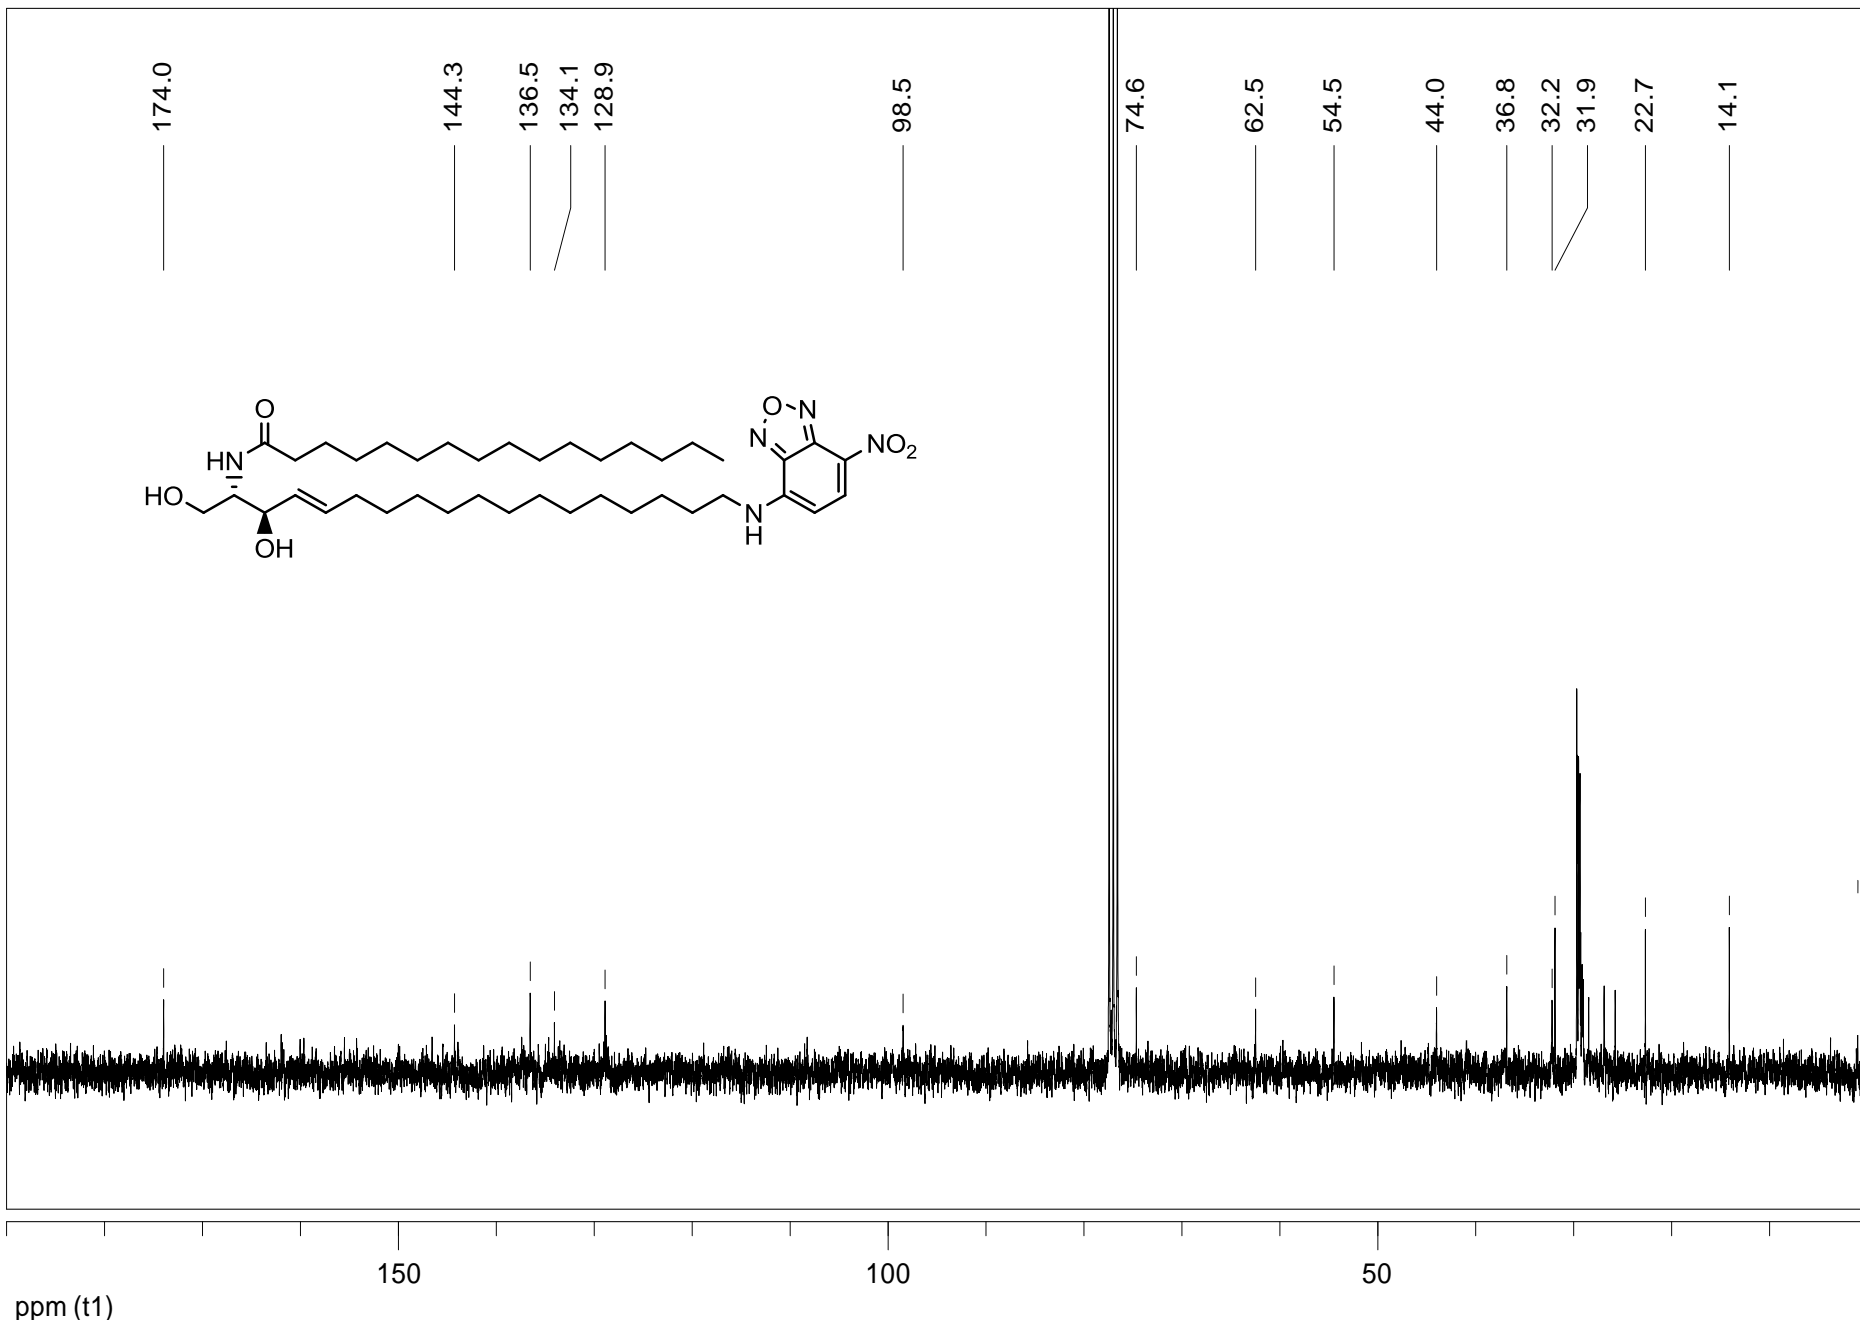

# $^{13}\text{C}$ NMR spectrum ( $\text{CDCl}_3 + \text{CD}_3\text{OD}$ , 75 MHz) of compound **19**

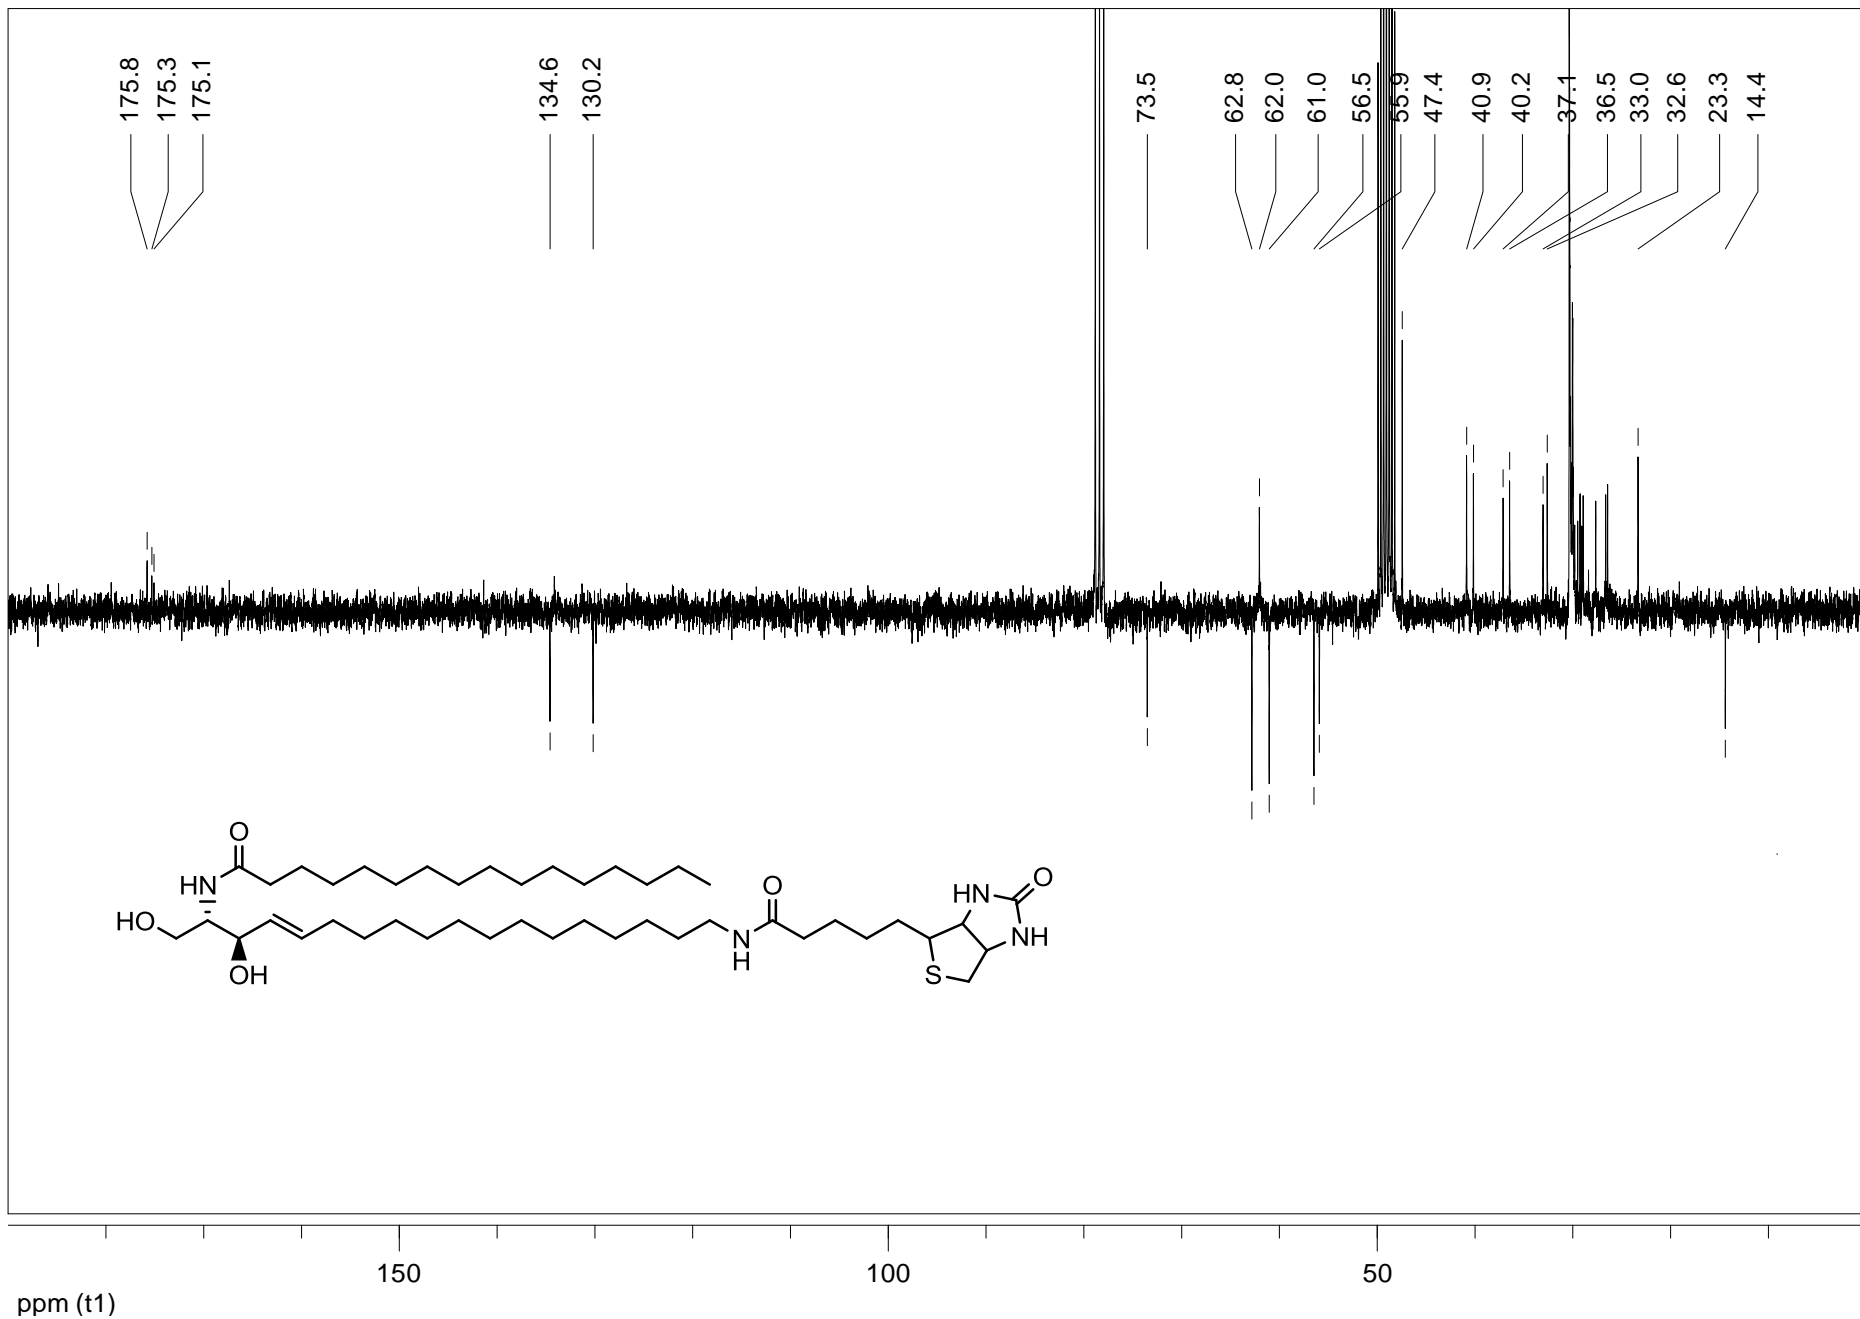



# <sup>13</sup>C NMR spectrum (CDCl<sub>3</sub>, 75 MHz) of compound 4

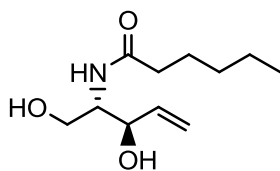

174.1

137.3

116.6

74.6

62.2

54.0

36.7

31.4

25.4

22.4

13.9

# <sup>13</sup>C NMR spectrum (CDCl<sub>3</sub>, 75 MHz) of compound **11**

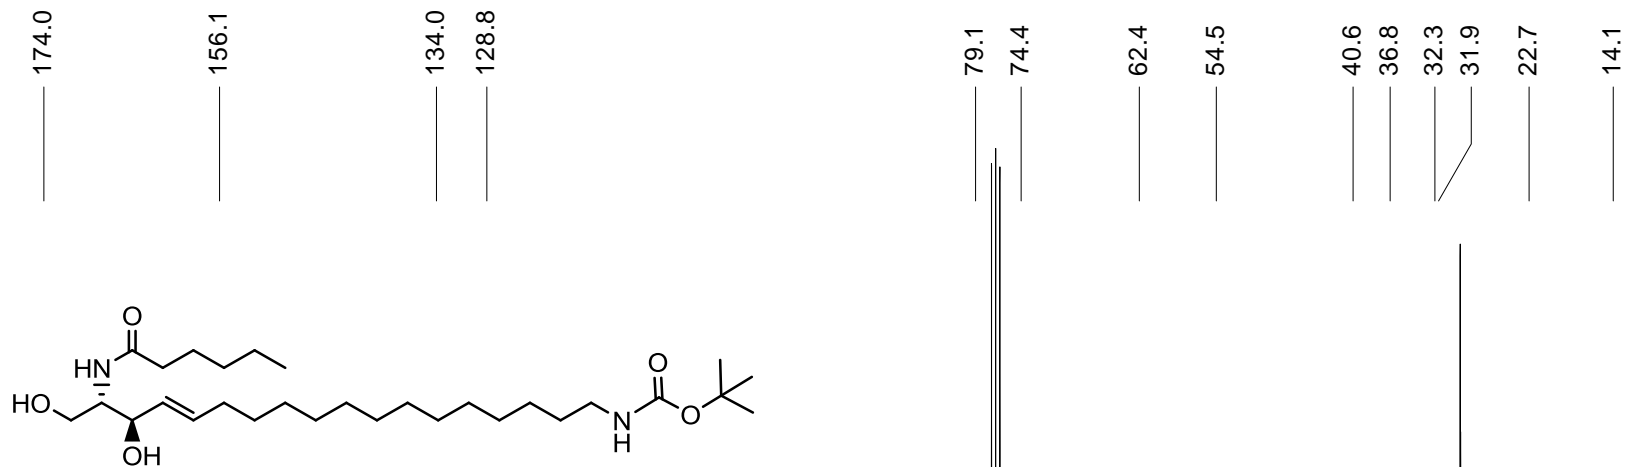

# $^{13}\text{C}$ NMR spectrum ( $\text{CDCl}_3 + \text{CD}_3\text{OD}$ , 75 MHz) of compound **14**

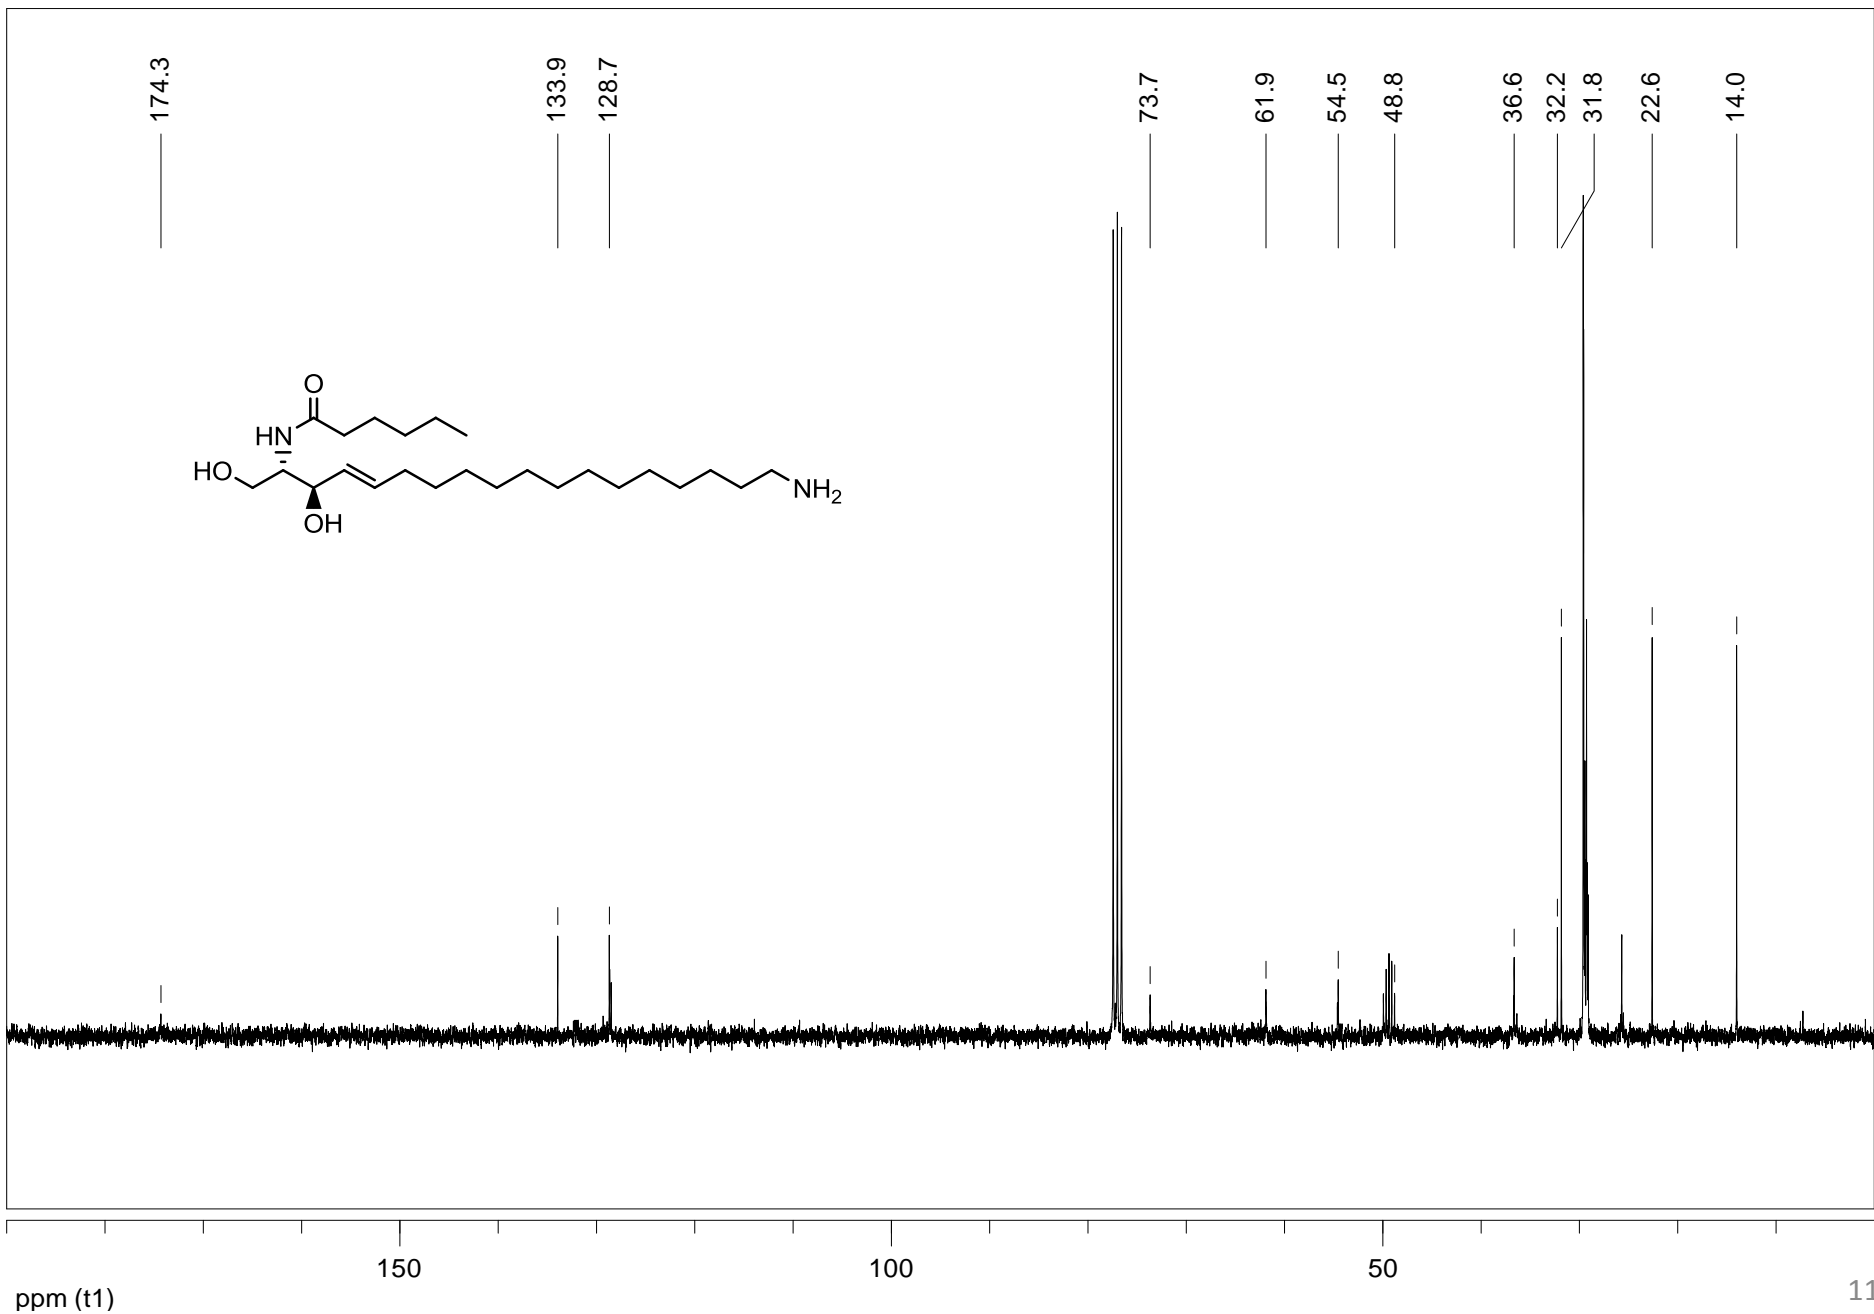



# $^{13}\text{C}$ NMR spectrum ( $\text{CDCl}_3$ , 75 MHz) of compound 5

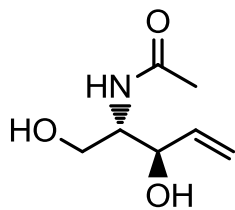

171.7

137.1

116.4

73.5

61.4

54.4

22.9

# $^{13}\text{C}$ NMR spectrum ( $\text{CDCl}_3$ , 75 MHz) of compound **12**

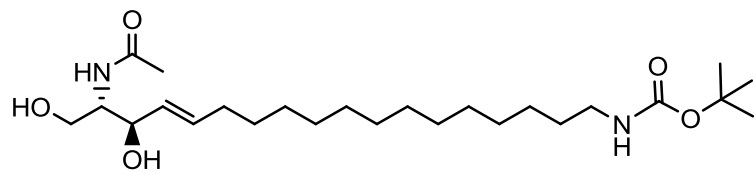

170.7  
156.0  
134.1  
128.8  
79.1  
74.7  
62.4  
54.4  
40.6  
32.2  
30.0  
29.5  
29.5  
29.4  
29.2  
29.1  
29.0  
28.4  
26.8  
23.4

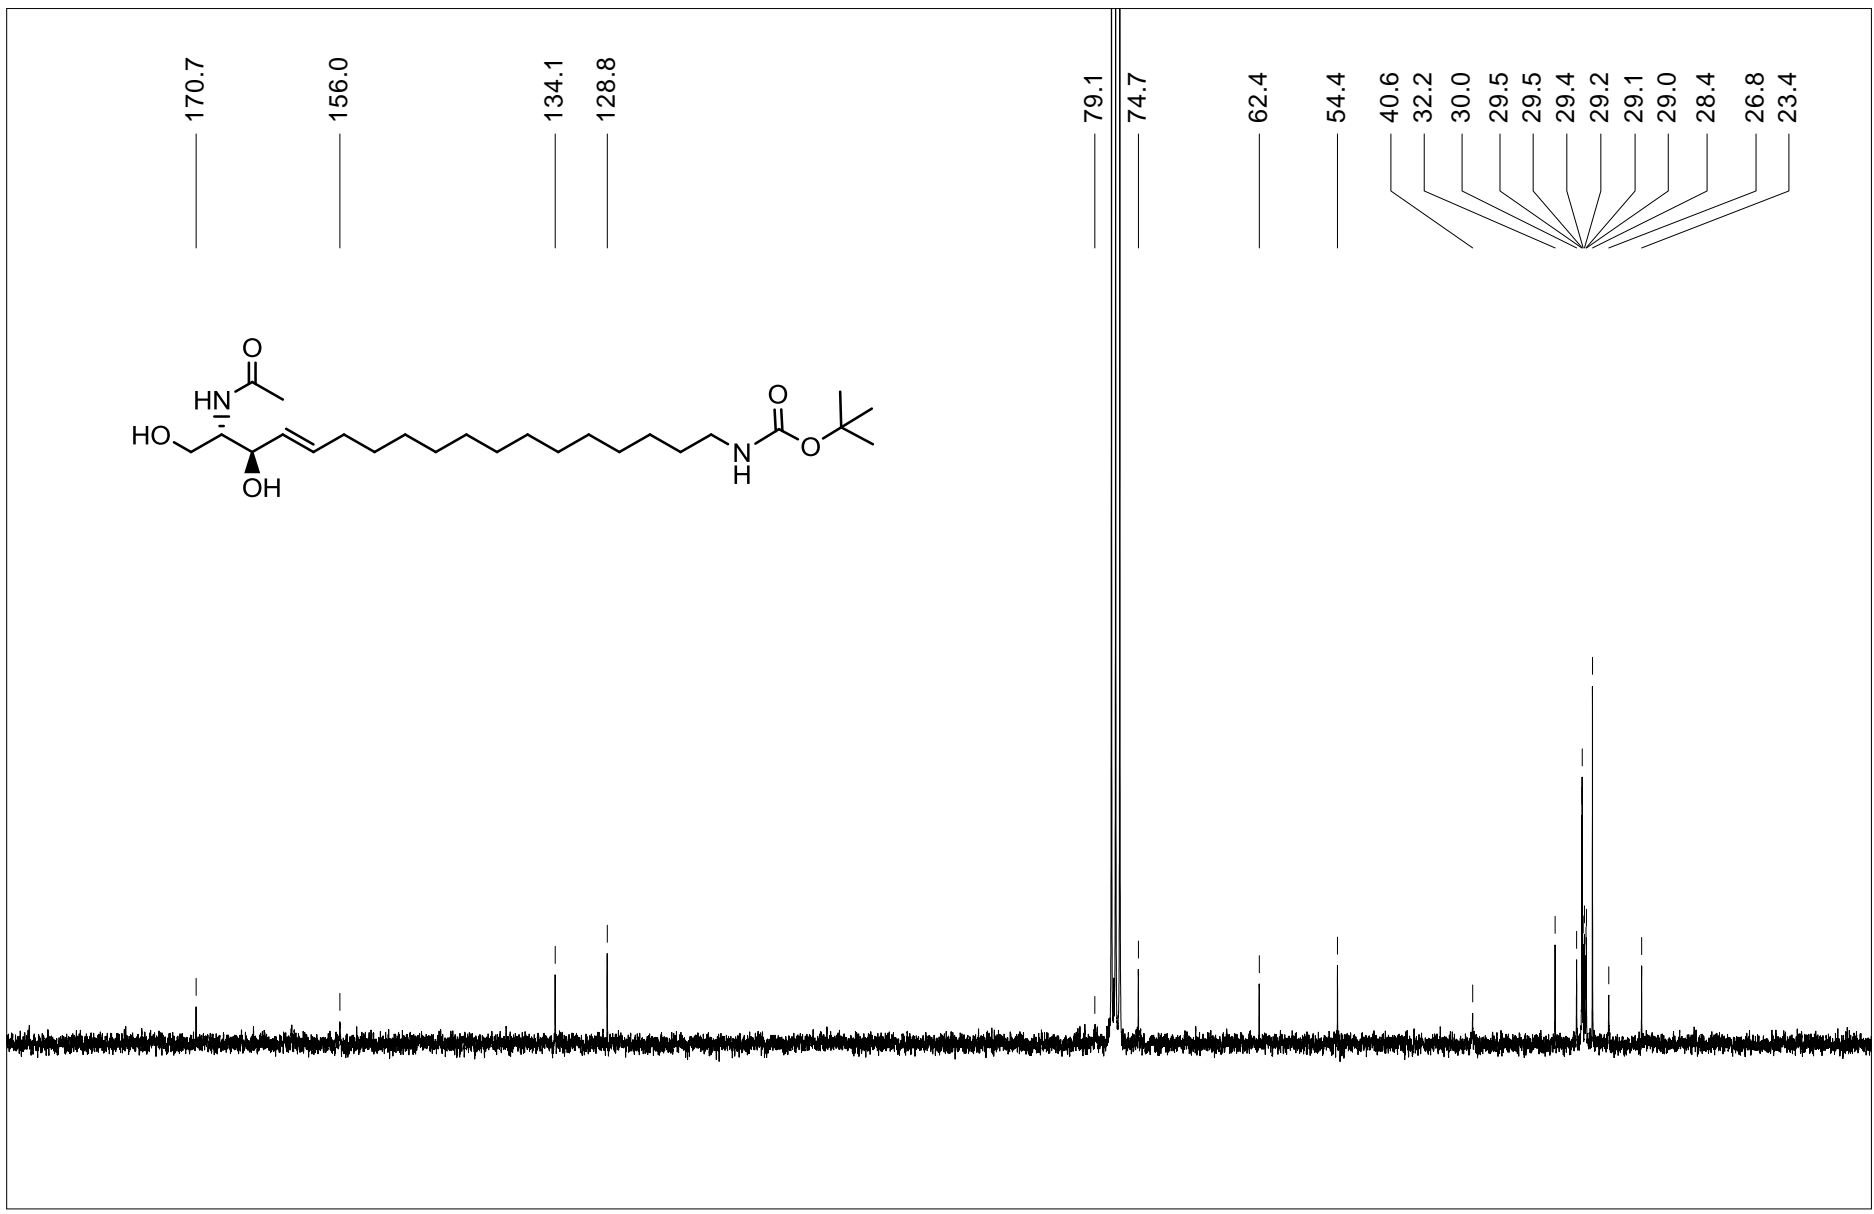

# $^{13}\text{C}$ NMR spectrum ( $\text{CD}_3\text{OD}$ , 75 MHz) of compound **15**

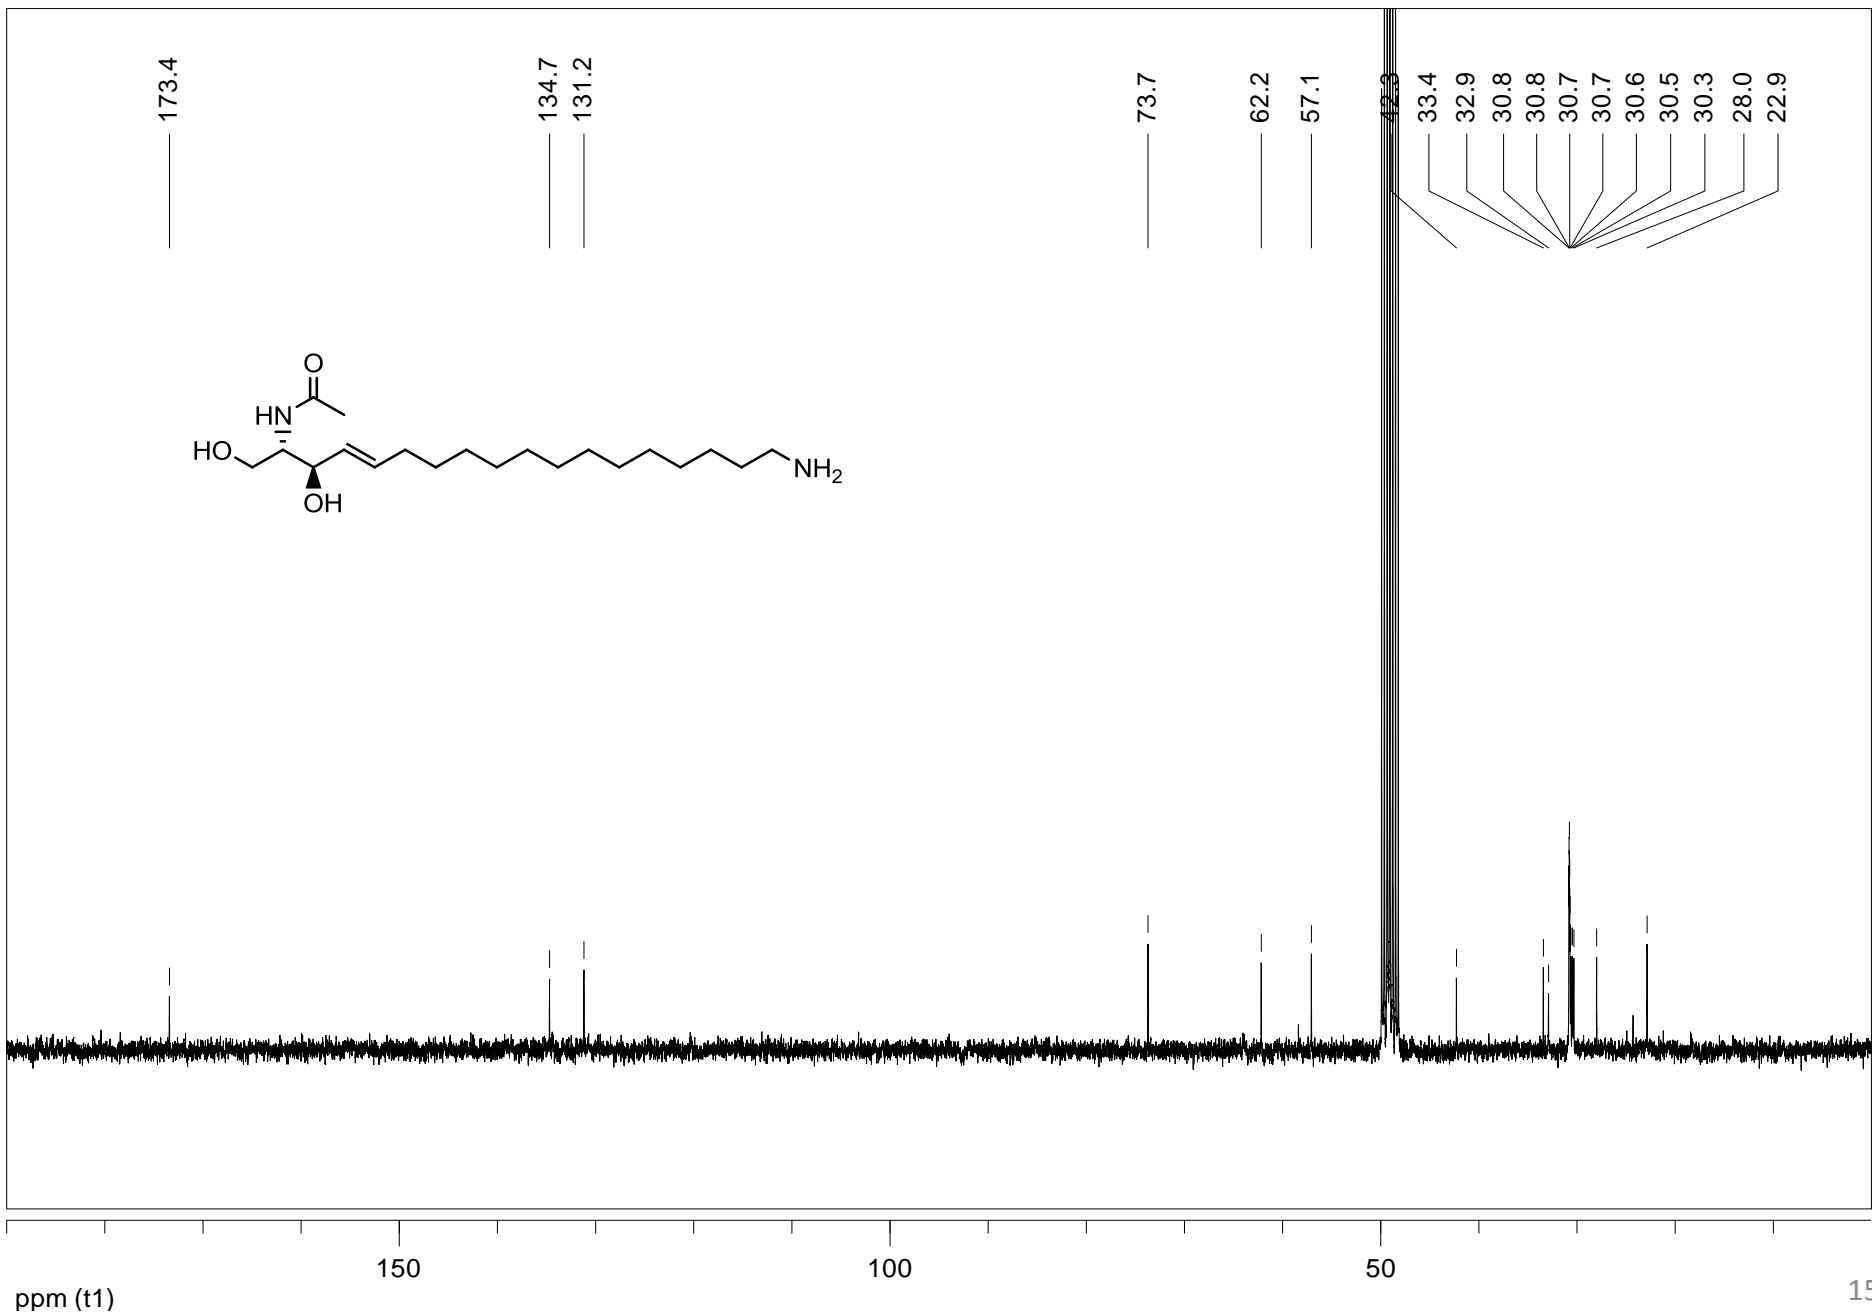

# $^{13}\text{C}$ NMR spectrum ( $\text{CDCl}_3$ , 75 MHz) of compound **18**

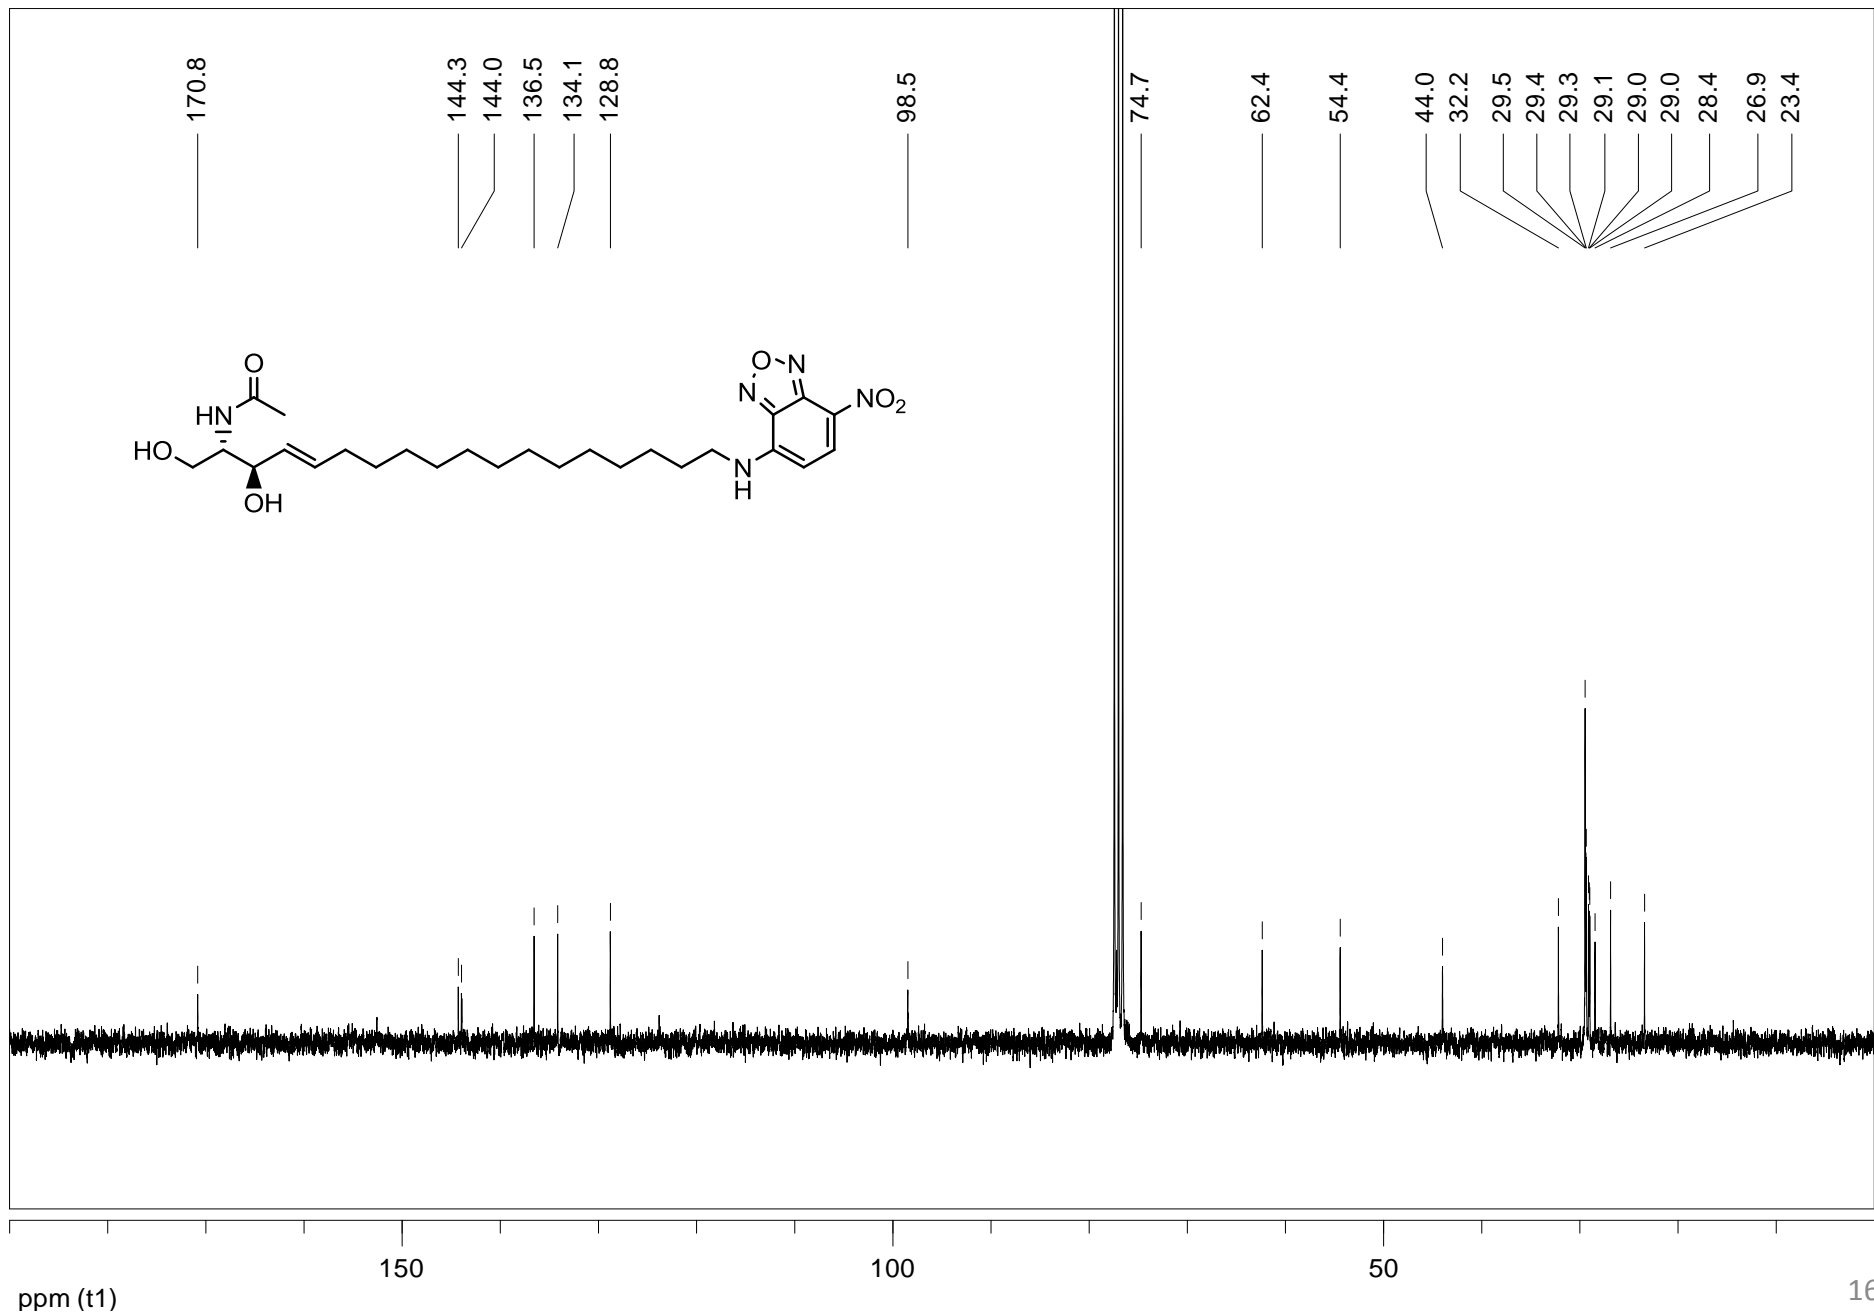



## Superposition of cristallographic pose (2E3O, magenta) with docked poses (light purple, cyan, salmon) of C16-ceramide .

These results show a good agreement in reproducing conformation and hydrogen bond network at polar head level. Calculation was done in 2E3N cavity (light blue) after structural alignments and gives RMSD of 1.19, 1.05, 1.13 Angstroms respectively. Calculation was done using Molegro templates (H donor, H acceptor, steric) relative to cristallographic ceramide and flexible residues (45 residues around cavity).

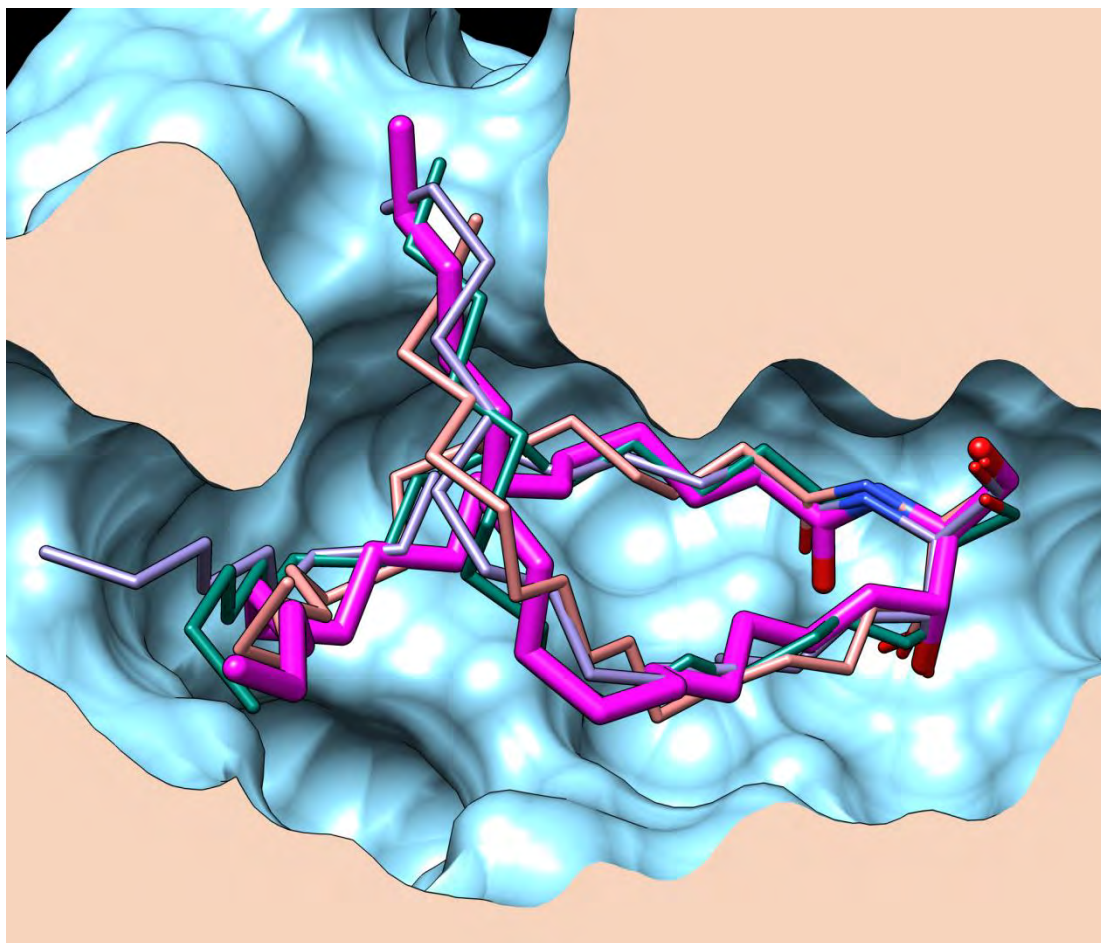

Superposition of eleven docked poses of probe **16** in clipped 2E3N cavity (light blue) corresponding to putative conformations with fluorophore found outside cavity. The pose shown in Fig. 3B is highlighted (blue sticks).

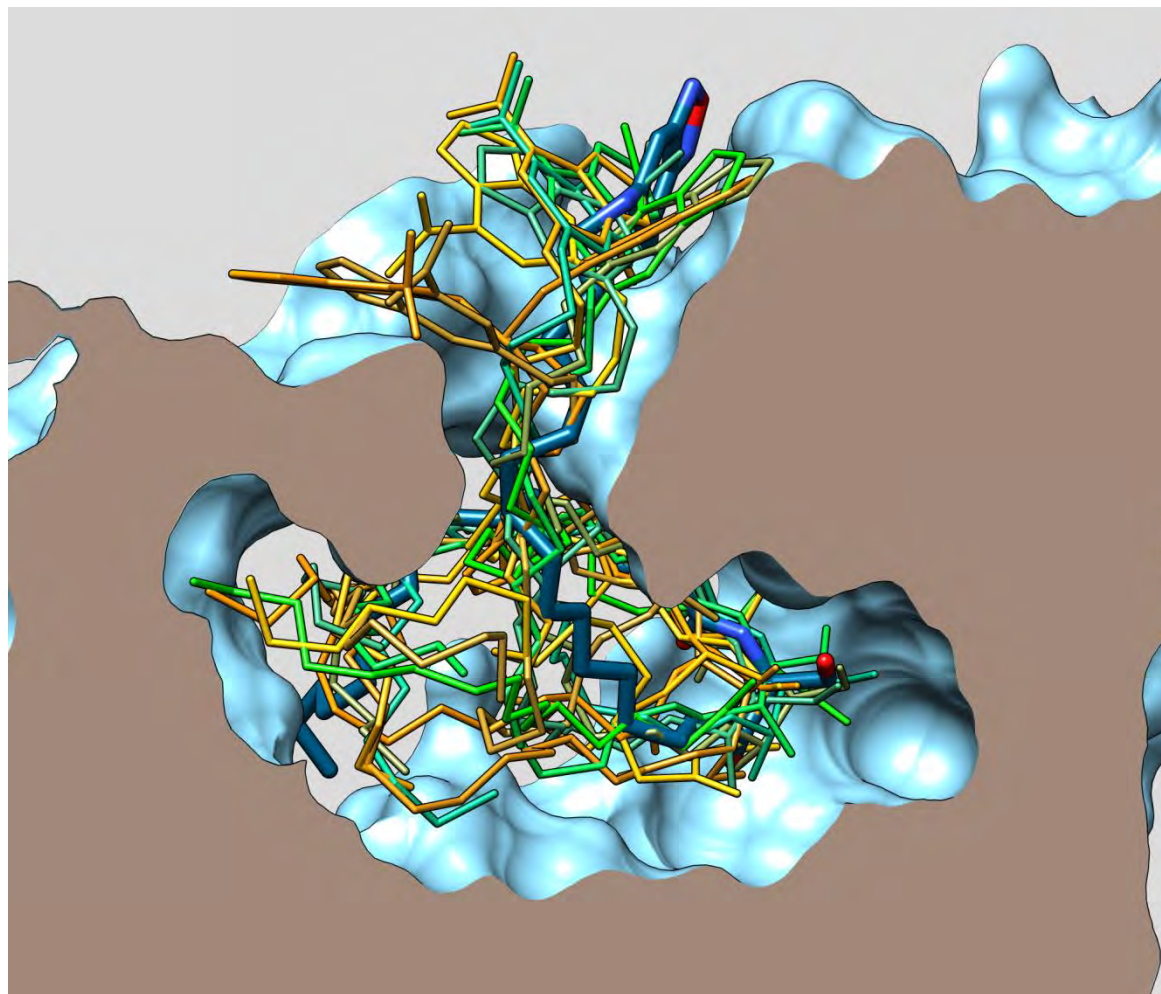

## Details of H-bonding calculated using Molegro Virtual Docker

| ID | Donor                       | Energy   | Length  | Additional Info                                                                                                              |
|----|-----------------------------|----------|---------|------------------------------------------------------------------------------------------------------------------------------|
| 0  | (TYR 553) OH – O1 (Ligand)  | -2.5     | 2.6562  | Donor rotatable;;[AA-A-D: 138.106 (100%)]                                                                                    |
| 1  | (Ligand) N1 – OE1 (GLU 446) | -2.5     | 2.76944 | ;;[AA-A-D: 158.639 (100%)];;[D-H-A: 152.709 (100%)] [AA-A-H: 151.152 (100%)]                                                 |
| 2  | (Ligand) O2 – OE1 (GLU 446) | -2.5     | 2.8515  | Donor rotatable;;[AA-A-D: 127.954 (100%)]                                                                                    |
| 3  | (GLN 467) NE2 – O2 (Ligand) | -2.5     | 2.80439 | ;;[AA-A-D: 126.524 (100%)];;[D-H-A: 43.4826 (0%)] [AA-A-H: 130.659 (100%)];;[D-H-A: 151.047 (100%)] [AA-A-H: 116.454 (100%)] |
| 4  | (Ligand) O3 – OD1 (ASN 504) | -2.5     | 3.01814 | Donor rotatable;;[AA-A-D: 122.144 (100%)]                                                                                    |
| 5  | (THR 447) OG1 – N3 (Ligand) | -1.66026 | 2.49923 | Donor rotatable;                                                                                                             |

## Binding assay of **16**, C6-NBD-Cer and C5-DMB-Cer to START domain

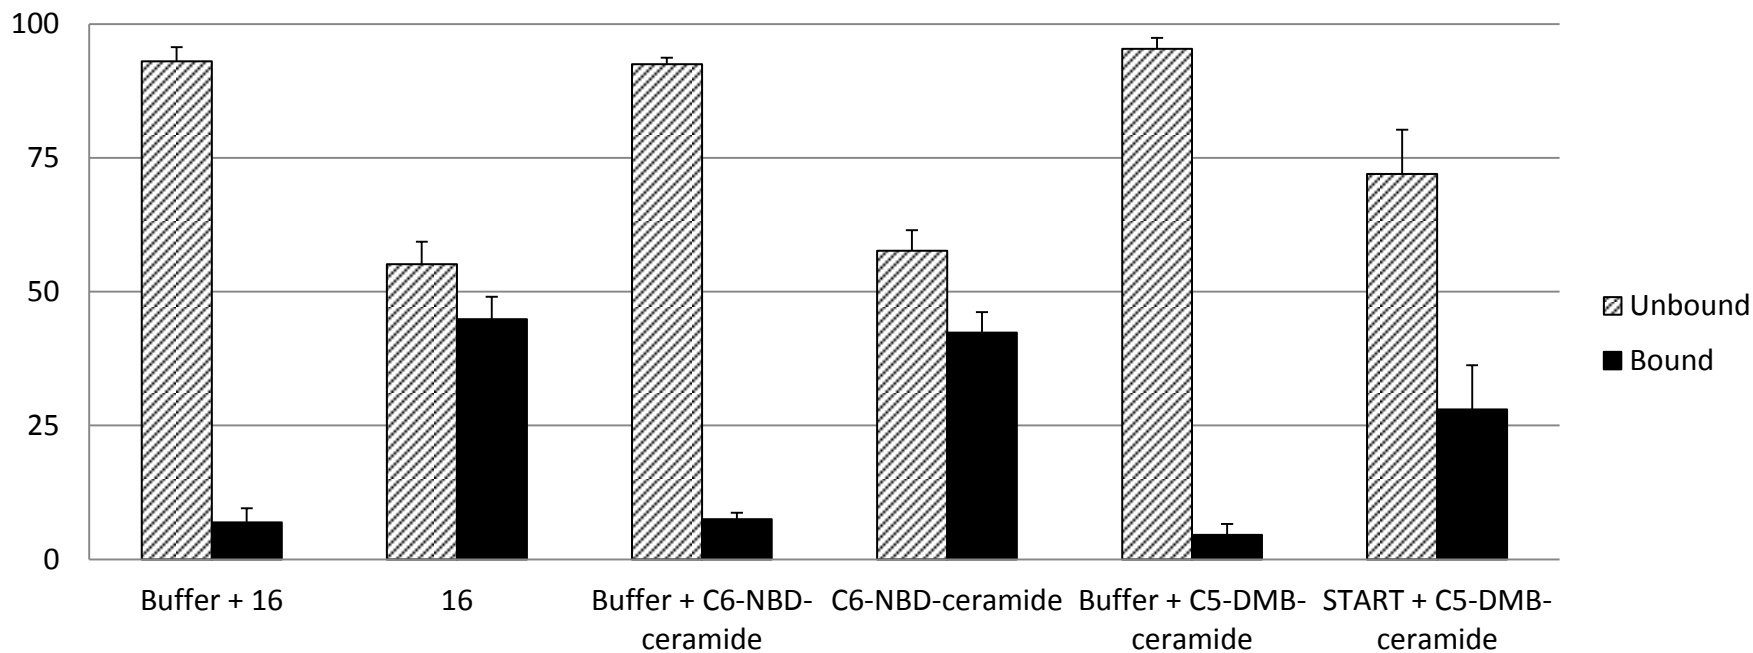

## Intracellular distribution of the C5-DMB-Cer

C5-DMB-Cer  
T0

C5-DMB-Cer  
T30 min

CHO LYA

CHO LYA hCERT

CHO LYA

CHO LYA hCERT

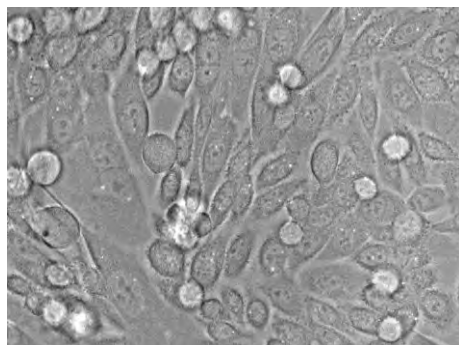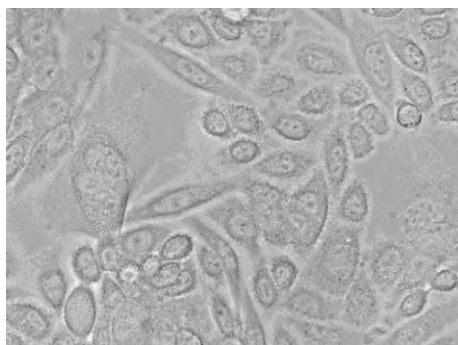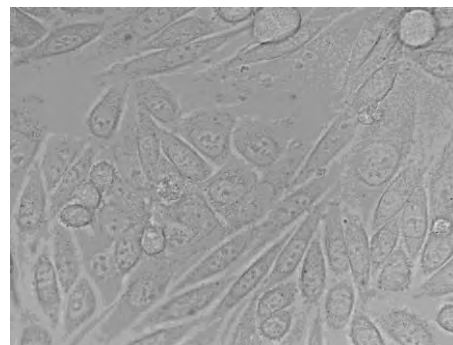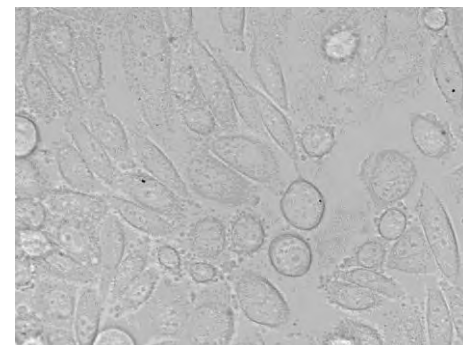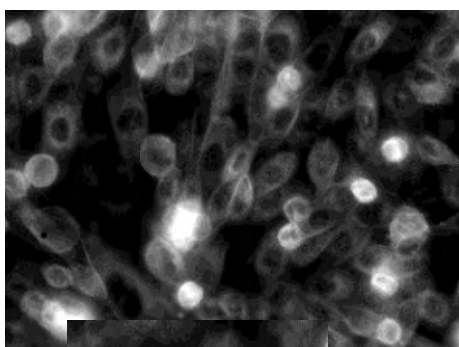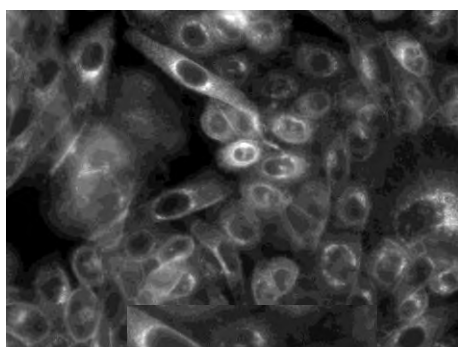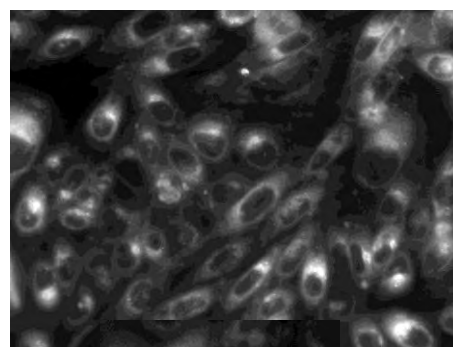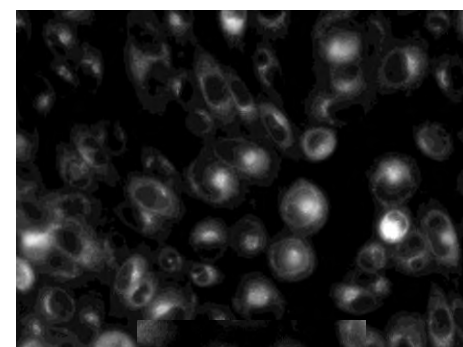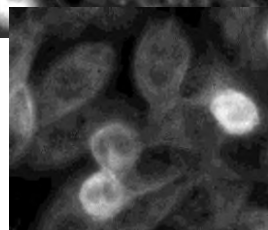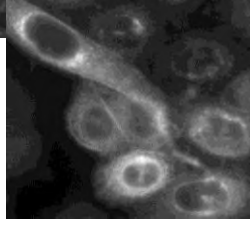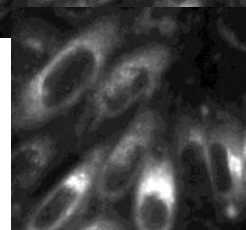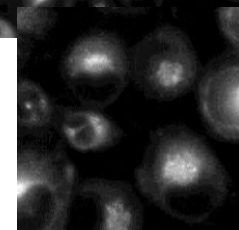

Filtre GFP Obj 40x

## Intracellular distribution of compound **16**

Probe **16**  
T0

Probe **16**  
T30 min

CHO LYA

CHO LYA hCERT

CHO LYA

CHO LYA hCERT

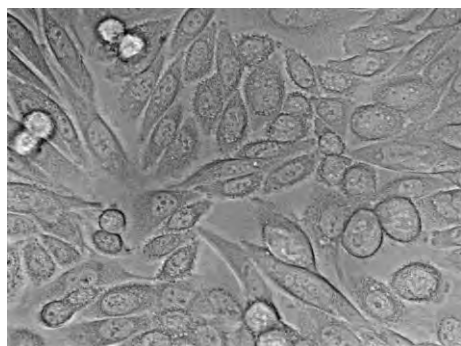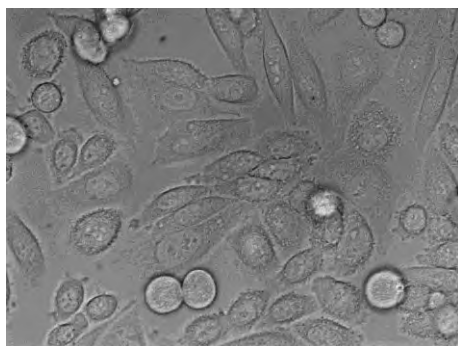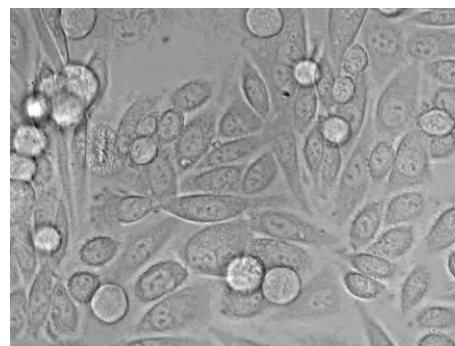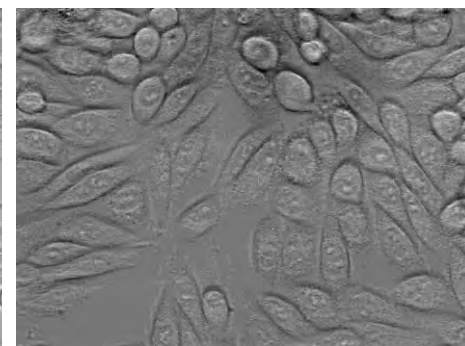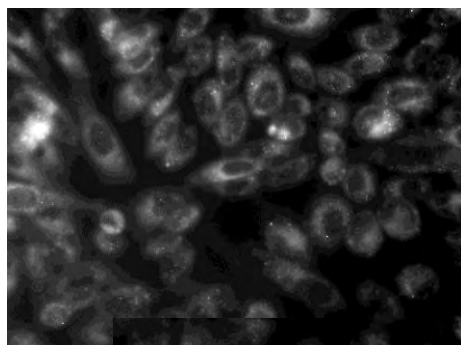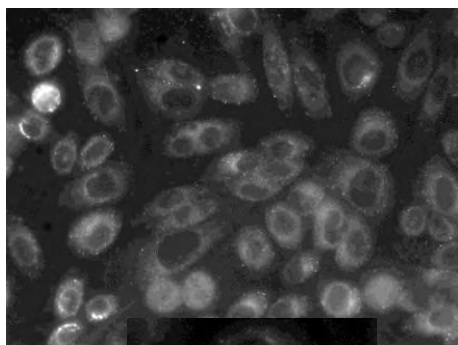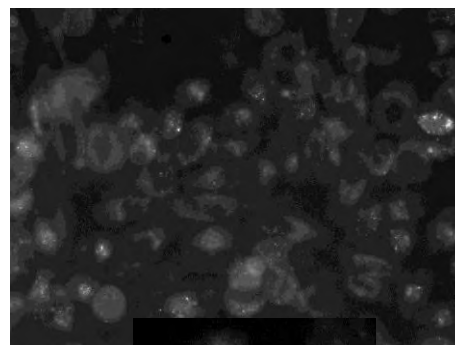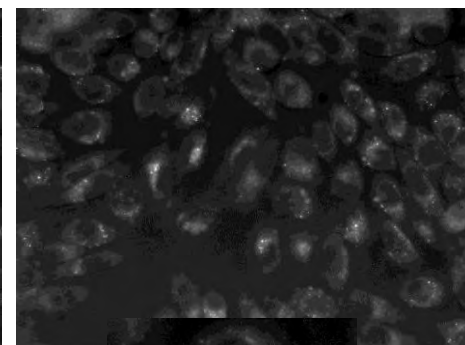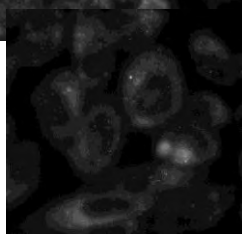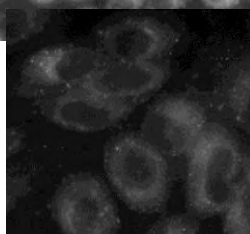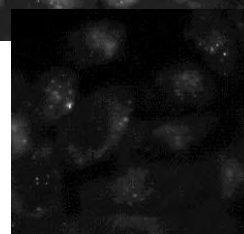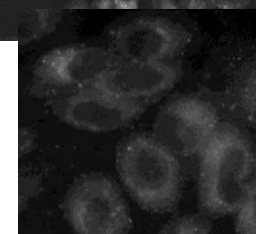

Filtre GFP Obj 40x

## Intracellular distribution of the C6-NBD-Cer

C6-NBD-Cer  
T0

C6-NBD-Cer  
T30 min

CHO LYA

CHO LYA hCERT

CHO LYA

CHO LYA hCERT

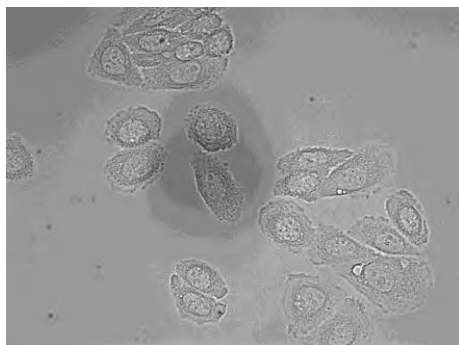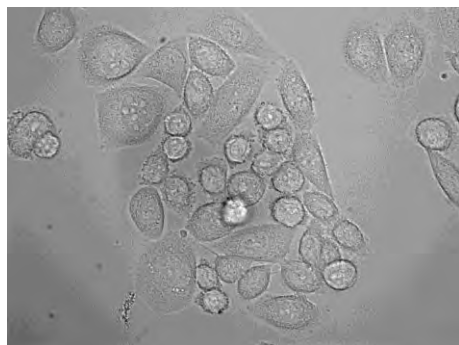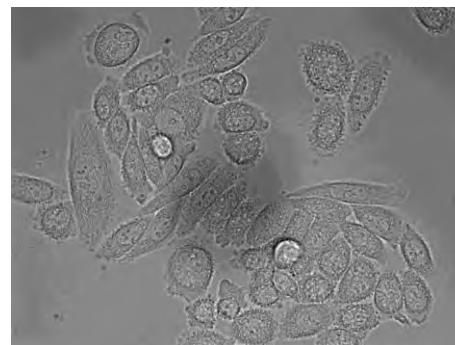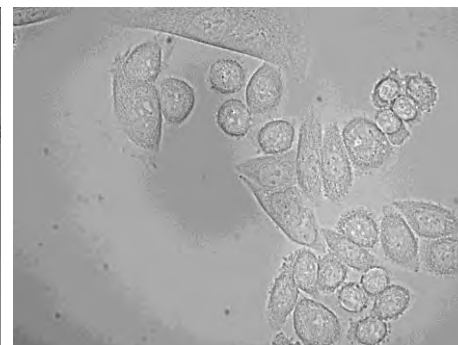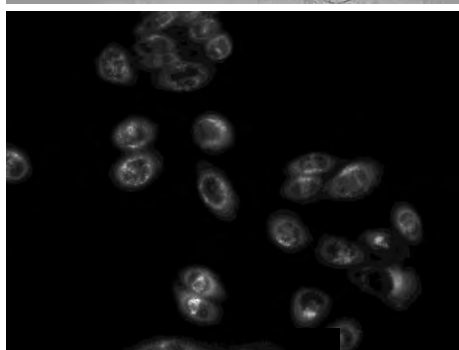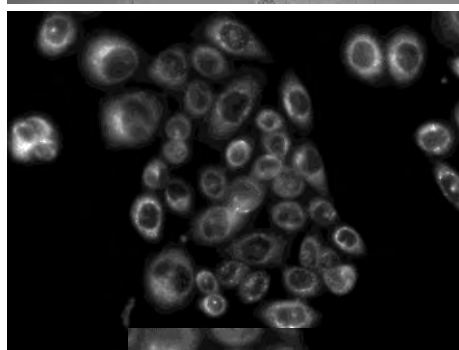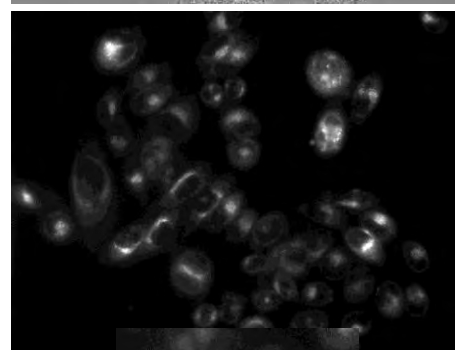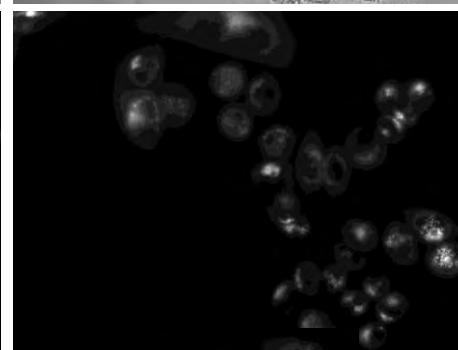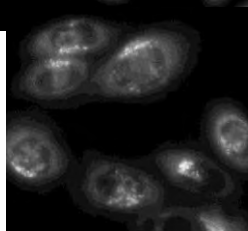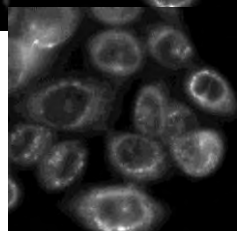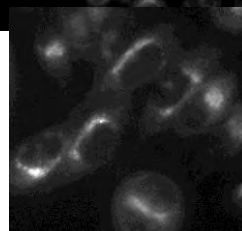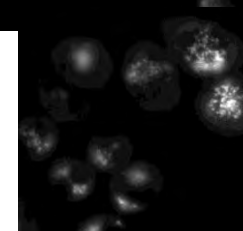

Filtre GFP Obj 40x
